# Supplementary material
Source: publisher figshare collection journal article supplement (https://frontiersin.figshare.com/ndownloader/files/16789562)
Supplement: Supplementary file 1 [file 16789562]

## Sheet: Review data
Appendix 2. Review data table, containing the original data derived from the literature review. For each paper, the discussed drivers, processes, functions and services are noted in their respective columns, with a brief explanation summarising the findings as obtained from the paper and/or as interpreted by the authors, followed by the initially assigned bundle. For each paper, the species categ…
ID	Paper	Species category	Driver	Process	Function	Service	Explanation	Assigned bundle
P10	Galimany et al. 2017	Epifaunal-suspension, Infaunal-suspension	OM concentrations	Filter feeding	Water column filtration	Water quality regulation	OM had a negative relationship with filtration rate for both species and rejection for oysters, but not clams	Coastal health and quality
P100	Pratt et al. 2015	Infaunal-deposit	Turbidity	Feeding behaviour	Nutrient exchange, benthic metabolism	Nutrient cycling, sediment biogeochemistry	Turbidity stressors did not alter functioning itself, but affected the combination of factors contributing to the EF. Shading affected the relative influence of M. liliana on fluxes of nutrients and oxygen.	Interaction
P103	Dudas et al. 2007	Infaunal-suspension	Invasive species	Growth, survival rates, fecundity	NA	NA	Survival of larger clams (>40 mm) is the most important for population growth based on elasticity and sensitivity analyses.	NA
P105	Skilleter et al. 2006	Bivalves	Dredging	Survival	NA	NA	The study indicates a change in community composition as a result of dredging with some variation in bivalve species as well.	NA
P108	Winberg & Davis 2014	Infaunal-suspension	Marine protected areas	Survival	Community composition alterations	Biodiversity	The installation of marine protected areas caused a shift in benthic macrofauna assemblages with shifts toward relatively immobile, suspension and deposit feeding species increasing up to 6-fold in abundance (including juvenile bivalves). Overall an increase in spatial homogeneity and a shift in beta-diversity	Biological structuring
P109	Li et al. 2012	Epifaunal-suspension	Seasonal/ temporal	Filter feeding	Water column filtration	Water quality regulation	Oyster particle clearance rates can vary on both a short (minutes/hours) and longer (seasonal) timescale. Short term variation can be explained by temperature, DO cycles, wind driven turbulence. Seasonal cycles are related to the presence of a harmful algae that depressed feeding and therefore resulted in slow/no growth and increased mortality.	Coastal health and quality
P109	Li et al. 2012	Epifaunal-suspension	Seasonal/ temporal	Filter feeding	Biomass production	Aquaculture	For the delivery of ES from shellfish aquaculture and restoration, the potential temporal variability in feeding resulting from environmental variation should be taken into account.	Marine resources
P11	Burge et al. 2016	Epifaunal-suspension, Infaunal-suspension	Pathogen	Filter feeding	Pathogen augmentation and reduction	Removal of pathogens	The effect of filtration on pathogen transmission and disease risk can be either positive or negative depending on bivalve and pathogen specific selectivity or mechanisms.	Coastal health and quality
P110	Van Colen et al. 2015	Infaunal-deposit	Bottom-up, top-down control	Bioturbation	Community composition alterations	Biodiversity	The study lookst at the effect of macomona liliana on meiofauna community composition as a result of top-down (predator exclusion) and bottom-up (enhanced MPB primary production) regulation in the system. Results show the complex interactions occuring in this sandflat indicating that macomona density and sedimentation or predation can have a significant effect on the biodiversity at these sites.	Biological structuring
P112	Vaudrey et al. 2009	Epifaunal-suspension	NA	NA	NA	Aquaculture	Understanding interactions between and impacts of shellfish aquaculture activity and the marine environment (in this case eelgras beds), is a necessary steph for sustainable growth of the industry	Marine resources
P114	Botelho et al. 2015	Infaunal-suspension	Contamination (E. coli & nutrients)	Filter feeding	Bioaccumulation	Removal of pathogens, nutrient cycling	Temporal variation: nutrient concentrations in water column and E. coli in clams was lower in summer than other seasons. Spatial variation: only coupling between E. coli and nutrients in site near city effluent.	Coastal health and quality
P117	Van Colen et al. 2013	Infaunal-suspension	Terrestrial sediment loading, hydrodynamic forcing	Bioturbation	Interference competition	Biodiversity	Cockle interference effects relate to physical disturbance, and temporal changes in SSC and onthogenetic changes in organsim traits. These effects were context dependent and only present in cohesive sediments, where the presence of cockles decreased the density of surface-dwelling species. This density reduction was most pronounced in the larval/juvenile season, indicating vulnerability of these …	Biological structuring
P118	de Juan et al. 2014	Infaunal-suspension, infaunal-deposit	Defaunation (smothering)	Recruitment, settlement	Community composition alterations	NA	Austrovenus stutchburyi and Macomona liliana were not able to recover at most sites. This is one of the main divergences between distrubed and control plots. The lack of recovery of these key species result in the loss of key ecosystem functioning with consequent implications for the functional performance of the estuarine system.	NA
P12	Deng et al. 2015	Infaunal-suspension	Aquaculture	Bioturbation	Sediment reworking	Habitat provision, Biodiversity	The presence of ark shells resulted in higher archaea diversity in intertidal sediments	Biological structuring
P120	Riedel et al. 2014	Infaunal-suspension, Infaunal-deposit, epifaunal suspension	Hypoxia, anoxia	Behaviour, locomotion, survival	Community composition alterations	Biodiversity	Hypoxia and anoxia resulted in altered behaviour and locomotion in bivalves. Some species (Abra alba, some Chlamys varia, venerupis rhomboides) didn't survive high anoxia levels, while Corbula gibba did survive. This together with the alterations in other invertebrate species results in altered community composition and reduced biodiversity in the system	Biological structuring
P121	Hewitt & Norkko 2007	Infaunal-suspension	Sedimentation	Feeding behaviour	Biomass production	NA	The study highlights the importance of approriate temporal scales in studying the feeding response of bivalves under variable SSC conditions. They find that short term (and slightly longer term) lab experiments did not reflect feeding or biomass responses as found in longer term field experiments (where a stronger biomass response was observed).	NA
P124	Rossi et al. 2008	Infaunal-suspension	Anoxia	NA	Community composition alterations	Biodiversity	Following C. edule addition to anoxic plots resulted in decreased densities of M. balthica and increase of H. diversicolor.	Biological structuring
P124	Rossi et al. 2008	Infaunal-suspension	Anoxia	NA	Nutrient cycling, benthic mineralization	Nutrient cycling and removal, sediment biogeochemistry	Following C. edule addition to anoxic plots that had been recolonised for 7 months, resulted in 3-4 times higher ammonium release, while uptake of nitrate decreased depending on the recolinsation rate. They also affected oxygen uptake at all sites, due to specific respiration rates, altering sediment biogeochemistry	Interaction
P125	Marshall et al. 2017	Bivalves	Ocean acidification	Calcification	Biomass production	Aquaculture	Future pH scenarios will have negative impacts on bivalves fisheries compared to 2013 revenues.	Marine resources
P126	Scyphers et al. 2015	Epifaunal-suspension	Shoreline erosiion	Shell formation	Breakwater formation, community alterations	Shoreline stabilisation	Breakwater comprised of bagged oyster shell supported higher densities of live ribbed mussels, and both (+ reef balls) supported increased species richness of juvenile and smaller fishes compared to controls. No effects were found on larger fishes.	Habitat modification
P127	Frid 2011	Bivalves	Time	Body size, longevity, bioturbation	Carbon and nutrient cycling, trophic transfer	NA	The range and abundance of traits in the assemblage (community composition) showed only limited temporal variabilty. However, the estimated quanitity of ecosystem functions delivered did vary over the study period as a result of changing infauna density.	NA
P128	Karlson et al. 2010	Infaunal-deposit	Community biodiversity	Feeding behaviour	OM transfer, biodeposition	Sediment biogeochemistry	By deposit feeding, M. balthica incorporates and moves organic matter (C and N) from the algal bloom to the sediment. M. balthica incorporate relatively more N than C than the ratio present in cyanobacteria blooms. M. balthica is less efficient in both incorporation and retention of OM than the more diverse communities (which could affect the C and N cycles).	Habitat modification
P130	Marsden & Atkins 2010	Infaunal-suspension	Shellfish bed restoration	Growth, reqruitment	Biomass production	Production of food, coastal heritage	Restoration of degraded cockle beds is important in NZ estuaries, so studying the growth and recruitment of Austrovenus stutchburyi is important to understand the delivery of services related to the production of food and the strong cultural values associated with cockles by Maori	Marine resources
P132	Long et al. 2014	Infaunal-deposit	Hypoxia	Mortality, reproduction, behaviour, growth	Population stability, trophic interactions	Foodweb structure	Individual: decrease benthic abundance, biomass and production, behavioural changes cause higher predation rates, increase trophic transfer, but decreases benthic biomass and secondary production. Spatial: source/sink populations are formed between hypoxic and normoxic areas. Temporal: short term = increase in ES through trophic transfer, long term = population crash which results in a loss of ES.	Biological structuring
P133	Chertoprud et al. 2013	Infaunal-suspension, epifaunal-suspension	OM concentrations	Filter feeding	Water column filtration, particle reduction	Water quality regulation	The ecosystem functions as a filter for the fine organic particles transported by the river, on which shellfish have a significant impact	Coastal health and quality
P134	Thrush et al. 2006	Infaunal-suspension, infaunal-deposit	Adult removal	Filter feeding, bioturbation	Nutrient exchange, benthic metabolism, community composition alterations	Nutrient cycling, sediment biogeochemistry, biodiversity	Removal of large deposit feeders: decreased chlorophyll a concentration at the sediment surface, 50% reduction in NH4 efflux, increased denitrification in the dark. Removal of large suspension feeders: increase in MPB standing stocks, increase in NH4 efflux in the light. Larger changes caused by suspension than deposit feeders (especially NH4). Also significant changes in community structure, wit…	Interaction
P135	Hedge et al. 2014	Epifaunal-suspension	Propagule size and genetic richness	Colonization	NA	NA	"First evidence to show that increasing the genetic richness of a larval population may increase the colonization of marine oganisms." p. 174. The colonization probability was higher for genetic rich, large propagules compared to genetic poor propagules of a similar size. However, the same pattern was not observed for the small propagules (also tested for high and low genetic diversity).	NA
P136	Ruesink et al. 2006	Epifaunal-suspension, infaunal-suspension	Invasive species	Reef formation	Habitat alteration	Habitat provision, biodiversity	New habitat provided by invasive bivalves on the intertidal mudflat shifted it away from subtidal native oyster beds, and resulted in more diverse epibenthic organisms on C. gigas beds than in open mudflats. In general, some species increase and some decline, but the overall effect is alterations in community structure.	Biological structuring
P136	Ruesink et al. 2006	Epifaunal-suspension, infaunal-suspension	Invasive species	Filter feeding	Water column filtration	Water quality regulation	Native oyster filtration is roughly 6.0 x 10^9 l d-1 (prior to exploitation), while the introduced species result in at least 9.7 x 10^9 l d-1. Eventhough there is an increase (hence increase in ES), the difference is not proportional to the difference in yield as smaller individuals (native oysters) have higher per biomass filtration than larger individuals (pacific oysters).	Coastal health and quality
P136	Ruesink et al. 2006	Epifaunal-suspension, infaunal-suspension	Invasive species	Growth	Secondary production	Aquaculture	Annual yield of the introduced species far outweighs the historical landings of native oysters. Indicating an increase in ES.	Marine resources
P137	Ferreira & Bricker 2016	Epifaunal-suspension, infaunal-suspension	Eutrophication	Filter feeding	Benthic-pelagic coupling	Nutrient cycling and removal	Bivalves can be used to mitigate negative effects of eutrophication by reducing OM and modifying the processes/rates within an ecosystem. Eutrophication can have both primary (decreased light availability, increased OM depsotiion, algal dominance changes) and secondary (loss of SAV, low DO, harmfual algal blooms) symptons in ecosystems. Bivalve filter feeding can have a positive effect on those s…	Coastal health and quality
P137	Ferreira & Bricker 2016	Epifaunal-suspension, infaunal-suspension	Eutrophication	Growth	Biomass production	Aquaculture	Aquaculture of shellfish is significant in terms of production and results in the delivery of product (food) that benefits local economies. This should be incorporated in (international) management plans	Marine resources
P139	Lacoste & Gaertner-Mazouni 2015	Bivalves	Biofouling	NA	Benthic production, nutrient cycling	Nutrient cycling and removal, sediment biogeochemistry	Biofouling has a positive effect on nutrient cycling and bnethic production in aquaculture settings	Interaction
P139	Lacoste & Gaertner-Mazouni 2015	Bivalves	Biofouling	NA	Biomass production	Aquaculture	Biofouling has a negative effect on shellfish aquaculture, and its control results in additional costs that can represent up to 30% of the total operational costs.	Marine resources
P14	Hewitt et al. 2009	Infaunal-suspension, Infaunal-deposit	Heavy metal pollution	Bioturbation	Sediment reworking, nutrient fluxes, benthic-pelagic coupling	Nutrient cycling and removal	Heavy metal pollution affects community compostion, especially larger species (shellfish) that have a disproportionally large effect on EF.	Coastal health and quality
P141	Volety et al. 2014	Epifaunal-suspension	NA	Reef formation	Habitat engineering, carbon and energy transfer	Habitat provision, food web structure, biodiversity	Diverse fish, crustaceans and other invertebrate populations by providing critical nursery, food and habitat for recreationally and commercially important species	Biological structuring
P141	Volety et al. 2014	Epifaunal-suspension	NA	Filter feeding	Water column filtration, denitrification, contaminant bioassimilation	Water quality regulation, nutrient cycling, removal of pollutants/pathogens	Natural filter for phytoplankton, detritus, bacteria and contaminants resulting in enhanced water clarity and imporved water quality	Coastal health and quality
P141	Volety et al. 2014	Epifaunal-suspension	NA	NA	Shell formation	Carbon sequestration	Oysters secrete calcium carbonate shells from seawater, thereby removing CO2 from the water column and contribute to reduction in greenhouse gases.	Coastal health and quality
P141	Volety et al. 2014	Epifaunal-suspension	NA	Reef formation	Erosion reduction, wave attentuation, sediment re-suspension reduction	Shoreline stability, sediment stability	Prevention of coastal erosion and boat wake mitigation	Habitat modification
P142	Baggett et al. 2015	Epifaunal-suspension	Restoration	Reef formation	Habitat engineering	Habitat provision, biodiversity	Reef restoration can have a number of positive impacts on the ecosystem that should be monitored, including the enhancement of biodiveristy (or of a specific species), shoreline protection of "live shorelines" and the regulation of water quality through improving water clarity.	Biological structuring
P142	Baggett et al. 2015	Epifaunal-suspension	Restoration	Filter feeding	Water column filtration, improving water clarity	Water quality regulation	Reef restoration can have a number of possitive impacts on the ecosystem that should be monitored, including the enhancement of biodiveristy (or of a specific species), shoreline protection of "live shorelines" and the regulation of water quality through improving water clarity.	Coastal health and quality
P142	Baggett et al. 2015	Epifaunal-suspension	Restoration	Reef formation	Biogenic habitat	Shoreline stabilisation	Reef restoration can have a number of possitive impacts on the ecosystem that should be monitored, including the enhancement of biodiveristy (or of a specific species), shoreline protection of "live shorelines" and the regulation of water quality through improving water clarity.	Habitat modification
P143	Peterson et al. 1994	Infaunal-suspension	Eutrophication	Survival, recruitment	NA	NA	The study documents a mass mortality event of Katelysia species related to eutrophication in the area.	NA
P144	Barrel & Grant 2015	Epifaunal-suspension	Spatial scale	Reef formation	Biogenic habitat	NA	The study looks at the landscape structure of bivalves (and seagrass) and find specific patches	Biological structuring
P146	Quan et al. 2012	Epifaunal-suspension	Restoration	Reef formation	Habitat provision	Habitat provision, biodiversity	Oyster reef restoration resulted in increased trends in community metrics (species richness, abundance and biomass) of benthic macrofauna over a 5 year period. Mostly crustaceans and polychaetes incresed, barnacles abundance and biomass decreased however with reef development.	Biological structuring
P147	Milbrandt et al. 2015	Epifaunal-suspension	Restoration	Reef formation	Habitat provision	Habitat provision, biodiversity	They found similar results for diversity between restored and natural reefs. Xanthid crab densities were also similar, while P. armatus densities were lower in the restored reefs	Biological structuring
P147	Milbrandt et al. 2015	Epifaunal-suspension	Restoration	Filter feeding	Water column filtration	Water quality regulation	Reef filtration rates were lower than expected, but still indicate the potential delivery of an ES (as chlorophyll a is removed).	Coastal health and quality
P148	Sandwell et al. 2009	Infaunal-suspension	Cockle density	NA	Nutrien fluxes, primary production	Nutrient cycling, sediment biogeochemistry	Rates for oxygen and ammonium fluxes increased with increasing cockle densities, and significant differences between light and dark benthic chambers were observed. Overall, results suggest that a reduciton in cockle dnesity will lower nutrient fluxes potentially influencing system productivity by reducing MPB production	Interaction
P149	Townsend et al. 2014	Infaunal-deposit	Terrestrial sediment loading	NA	Sediment reworking	Sediment biogeochemistry	Addition of thin terrigenous sediment caused an increase in reworking behaviour, and probable changes in siphon activity (feeding). Increased sediment reworking is likely to clear debris and to reconnect to the overlying water. Elevated siphon activity clars the feeding area. There was no effect on either plume formation and migration of M. liliana.	Coastal health and quality
P15	Brumbaugh & Coen 2009	Epifaunal-suspension	Reef restoration	Reef formation	Water column filtration	Water quality regulation	Water filtration is opted as one of the ES related to reef restoration	Coastal health and quality
P15	Brumbaugh & Coen 2009	Epifaunal-suspension	Reef restoration	Reef formation	Habitat engineering	Habitat provision, shoreline stabilization	Biogenic reefs will provide habitat for other species and can stabilize shoreline	Interaction
P150	Aoki et al. 2011	Infaunal-suspension	Environmental conditions (salinity/hypoxia)	Bivalve community structure and distribution	NA	Production of food, shellfish gathering, sediment stability	Salinity and hypoxia are the environmental factors explaining most variation in bivalve community structure as well as poistion in the bay. In the southern part, Manila clam populations provide the ES of collecting clam "Shiohi-gari", while in the northern part they provide sediment stability from wave dissipation	Interaction
P152	Pranovi et al. 2013	Infaunal-suspension	Harvesting	NA	Biomass production, energy and C transfer	Production of food	The study estimates the natural capital and functional value from mechanical clam harvesting and compares it to multi-species artisanal fisheries.	Marine resources
P153	Lohrer et al. 2016	Infaunal-suspension	Cockle density	Bioturbation	Primary production, nutrient fluxes	Nutrient cycling, sediment biogeochemistry	Seagrass appears to benefit from the production and release of utilisable ammonium by cockles as the latter bioturbate the sediment. This results in an increase in primary production of these species	Interaction
P154	Sousa et al. 2009	Epifaunal-suspension, infaunal-suspension	Invasive species	Bioturbation, shell production, filter feeding	Habitat engineering	Shoreline stabilisation, sediment stability, sediment biogeochemistry, habitat provision	Engineering activites of non-indigenous invasive species, provide colonisable substrate and refuge (ie habitat provision), alters near-bed flows and sediment transport (sediment/shoreline stability), and changes chmistry, grain size and OM content of the sediment (sediment biogeochemistry), and increased light penetration by filter feeding	Habitat modification
P155	Grizzle et al. 2008	Epifaunal-suspension	Restoration	Filter feeding	Water column filtration, seston removal	Waterquality regulation	Data indicate that restored shellfish reefs should provide water-quality improvements soon after construction, and the overall impact is probably determined by the size and density of the resident filter feeder poopulation relative to water flow characteristics over the reef	Coastal health and quality
P157	Norkko et al. 2013	Infaunal-suspension, infaunal-deposit	Large adult removal	Bioturbation, filter feeding	Nutrient exchange, benthic metabolism community composition	Nutrient cycling, sediment biogeochemsitry	The number of large adults is shown to be a strong predictor of EF. Increased number of large adults (as well as bivalve biomass) results in lower O2 fluxes, higher phosphate (small numbers) and ammonium fluxes (higher efflux from the sediment).	Interaction
P159	Green et al. 2017	Epifaunal-suspension	Microplastics	Filter feeding	Water column filtration, nutrient exchange, primary production, community composition	Water quality regulation, nutrient cycling, sediment biogeochemistry, increasing biodiversity	M. edulis: filtration reduced when exposed to high concentrations of microplastics, but no effects on EF or invertebrate communities. O. edulis: significant increase in filtration when exposed to both concentrations of microplastics, porewater ammonium and MPB (cyano bacteria) biomass decreased. Infaunal invertebrate communities differed, with less polychaetes an more oligocheates with addition o…	Interaction
P16	Gittman et al. 2016	Epifaunal-suspension	Living shoreline creation	Reef formation	Habitat engineering	Habitat provision, biodiversity	Sills support higher abundances and species diversity than unvegateted habitat or hard shorelines, including high cover of filter-feeding bivalves (food source and refuge habitat for nekton).	Biological structuring
P160	Broszeit et al. 2016	Epifaunal-suspension	Ocean acidification	Filter feeding, growth	Bioassimilation,burial, recycling	Removal of pollutants, removal of nutrients	Reduced growth (related to ocean acidification) and resulting negative effects on filtering capacity potentially leads to a decrease in bioremediation of wastes. Focus on the reduction of toxic products of phytoplankton, derivatives of burnt fossil fuel, metals, microplastics, nanoparticles and drugs, as well as a a more specific focus on the reduction of nutrients through eutrophication (as well…	Coastal health and quality
P161	Kellogg et al. 2013	Epifaunal-suspension	Restoration	Biodeposition	Denitrification, nutrient assimilation	Nutrient cycling and removal	Through denitrification and sequestration of nutrient in shells, bivalves are able to remove excessive nitrogen from the environment. Based on potential area for restored reefs, and the amount of N needed to be removed, calculations were made to show that 23% of the available bottom in Choptank river should be restored.	Coastal health and quality
P163	Quan et al. 2017	Epifaunal-suspension	Substrate type	Recruitment, growth	Biomass production	NA	Inconsiderate of the 4 substrate types used, in the end of the experiment (3 years), there were no significant differences in recruitment and abundance of live oysters, size distrubtions, and community structure/abundance of associated macrofauna.	Marine resources
P164	Villnas et al 2012	Infaunal-deposit	Hypoxia	Bioturbation	Sediment oxygen and nutrient fluxes	Nutrient cycling, sediment biogeochemistry	Increased duration of hypoxia gradually impaired the benthic community and caused concurrent changes in EF (sediment oxygen and nutrient fluxes), which is a result of both direct and indirect disturbance efects, of which the mediated changes in the benthic fauna explained a major part	Interaction
P167	Gottlieb & Schweighofer 1996	Epifaunal-suspension	Invasive species	Filter feeding	Water column filtration, benthic-pelagic coupling	Water quality regulation, nutrient cycling	Oysters biofilter the water and remove phytoplankton, which increases water clarity and stabilises pH and oxygen concentrations of the water. Through their influence on material processing (POC and chlorophyll a), bivalves contribute to the cycling of nutrients.	Coastal health and quality
P169	Pratt et al. 2015	Infaunal-deposit, infaunal-suspension	Spatial scale	Grazing	Top-down control, trophic interactions	Foodweb structure	Non-trophic interactions of macrofauna may play a greater role in determining spatial distributions in MPB biomass than the direct effects of deposit feeding. No relationship was found at a small scale (cm), but a negative relationship between M. liliana feeding traces and MPB biomass was found at 10's m scale (that incorporates sedimentary gradients).	Biological structuring
P17	Humphreys et al. 2015	Infaunal-suspension	Invasive species	Growth	NA	Provision of food	Invasive species used for aquaculture	Marine resources
P170	Grangere et al. 2010	Infaunal-suspension, epifaunal-suspension	Spatial scale	Filter feeding	Biomass production (growth), water column filtration, particle removal	Foodweb structure	Hydrodynamics, immersion time and oyster density were identified as the main factors controlling spatial heterogeneity for phytoplankton dynamics and bivalve growth	Biological structuring
P171	Pratt et al. 2014	Infaunal-suspension, infaunal-deposit	Terrestrial sediment	Bioturbation	Nutrient exchange, benthic metabolism	Nutrient cycling, sediment biogeochemistry	Mud content had a negative impact on all measured EF, with more variable outcomes in sandy sites, compared to the muddy sites. These results highlight the importance of increased mud content and the associated reduction in the abundance of strongly interacting key species on the loss of ecosystem function in intertidal sand flats	Interaction
P175	Cerco 2015	Epifaunal-suspension	NA	Filtration, excretion and respiration, deposition, diagenesis, denitrificaiton, burial	Carbon and nutrient burial, bioaccumulation in shells and removal	Nutrient cycling and removal	Oysters filter 28 metric tons nitrogen per annum, of which most is recycled, and 6.2 tons is removed per annum (through denitrification and burial of biodeposits). 2.5 metric tons of phosphorus is fitlered of which 0.2 tons is permanently removed through burial. 164 metric tons of carbon per annum is filtered from the water column and 15.2 tons is buried. 13 metric tons of carbon is burried in th…	Coastal health and quality
P176	Nuttall et al. 2011	Epifaunal-suspension, infaunal-suspension	Time	NA	Alterations in foodweb dynamics	Foodweb structure	Over 120 year, there has been a decline in ecosystem maturity, loss of top keystone species, loss of connectivity to the ocean. BSB historically supported eastern oyster populations, which collapsed starting in the 1890's to 1930's-40's. Hard clams increased at first, but collapsed in the 1970s due to overharvest.	Biological structuring
P177	Francois et al. 1999	Infaunal-suspension	NA	Bioturbation	Sediment reworking	Sediment biogeochemistry	Both species tested are biodiffusers, but they do so at different intensities, with R. decussatus having twice as high diffusion rates, and lower output to the water column than V. aurea. R. decussatus buries more OM and faster, which affects the early diagenesis processes and OM bioavailability for the other benthic species	Habitat modification
P178	Wrede et al. 2017	Infaunal-deposit	Spatial distribution	Bioturbation, bioirrigation	Sediment reworking	Sediment biogeochemistry, nutrient cycling	N. nitidosa displayed highest bioturbation acvitivty of the 3 key species. It redistributed particles and enhanced the oxygenation depth. However, due to shallow burial depth (and low bioirrigation rates), they did not find a significant effect on biogeochemical cycling of nutrients.	Interaction
P179	Saurel et al. 2014	Infaunal-suspension	Harvesting	Filter feeding	Water column filtration, particle reduction	Water quality regulation	Nutrient removal results in nutrient credit trading value of USD 41000 per year (which equals ~ 1000 PEQ).	Coastal health and quality
P179	Saurel et al. 2014	Infaunal-suspension	Harvesting	Growht, mortality	Biomass production	Aquaculture, Production of food	Model outputs indicate farm production ranging from 32 to 45 t of clams per year	Marine resources
P18	Franzo et al. 2016	Epifaunal-suspension	Environmental pollution	NA	OM decomposition and C transfer	Food web structure	Bivalve farms produced fresh OM, which fuelled microbial processes and the mobilised C was transferred to higher trophic levels	Biological structuring
P180	Boldina et al. 2014	Infaunal-suspenstion	Clam harvesting	NA	Community composition alterations	Biodiversity	Results indicate that nematodes and copepods aggregate in spatial structures at a meso-scale. For nematodes, the aggregation structure was larger for impacted sites (patch size of 16.9 cm vs. 7.9 (non-impacted)) and didn't show cyclicity, which suggest that clam digging affects spatial aggregative characteristics at the impacted site. Similar results (reduction in autocorrelation strenght) was ob…	Biological structuring
P182	Coen & Luckenbach 200	Epifaunal-suspension	Restoration	Reef formation	Habitat engineering	Biodiversity, habitat provision	Oyster reefs (both subtidal and intertidal) in previous studies have shown to affect biodiversity (through creation of habitat patches) and water quality regulation through water column filtration (where dense population can have a significant impact on basin wide water quality and phytoplankton dynamics).	Biological structuring
P182	Coen & Luckenbach 200	Epifaunal-suspension	Restoration	Filter feeding	Water column filtration	Water quality regulation	Oyster reefs (both subtidal and intertidal) in previous studies have shown to affect biodiversity (through creation of habitat patches) and water quality regulation through water column filtration (where dense population can have a significant impact on basin wide water quality and phytoplankton dynamics).	Coastal health and quality
P183	Filgueira et al. 2016	Epifaunal-suspension	Climate change, aquaculture	Filter feeding, nutrient excretion	Benthic-pelagic coupling	Water quality regulation, nutrient cycling	Ecosystem functioning is a balance between the primary production (which results from bottom-up control from riverine nutrients) and horizontal advecton (bay morphology influenced). Results suggest that temperature is the strongest climate change driver (as it influences metabolism). Aquaculture effects are related to bottom-up (ammonia excretion) and top-down (filter feeding) effects on bivalve-…	Coastal health and quality
P184	Liu et al. 2009	Infaunal-suspension	NA	NA	NA	Biodiversity	Clam cultering systems have an effect on the microbial and macrobenthos biomass and diversity	Biological structuring
P184	Liu et al. 2009	Infaunal-suspension	NA	NA	NA	Removal of pollutants/pathogens	Descirbed in the study as the amount of pollution treatment (+/-)	Coastal health and quality
P184	Liu et al. 2009	Infaunal-suspension	NA	NA	NA	Aquaculture	Aquaculture is assessed based on the income from clam culturing (+)	Marine resources
P185	Harris et al. 2015	Infaunal-deposit	Macamona density, light availability	Bioturbation, grazing	Sediment erosion potential	Sediment stabilisation	From the factors used in the correlation study, juvenile M.liliana and adult M. liliana had significant negative and positive effects (repsectively) on erosion threshold and Juvenile M. liliana had a positive effect on erosion constant. Juvenile and adult M. liliana have different effects with adults stabilizing the sediment, compared to juveniles, indicating a shift in species functioning.	Habitat modification
P186	Donadi et al. 2013	Infaunal-suspension	Hydrodynamic forcing	Biodeposition, mucus production	Sediment stabilization and primary production	Sediment stabilisation, sediment biogeochemistry	In the sandy area, cockles has a positive effect on MPB growth compared to lugworms. In the muddy site, chlorophyll a content was higher than in the sandy site, but there were no effects observed from either cockles or lugworms. Overall, the results suggest that non-trophic interactions by ecosystem engineering bivalves control primary production of intertidal areas, an that the sediment-stabiliz…	Habitat modification
P187	McLenaghan et al. 2011	Infaunal-suspension	Eutrophication	bioturbation, filter feeding	Oxygen consumption, ecosystem metabolism, primary production	Sediment biogeochemistry	Mya arenaria in isolation did not substantially alter nutrient or algal dynamics.	Habitat modification
P188	Sunda et al. 2006	Infaunal-suspension, epifaunal-suspension	Eutrophication, HABs	Filter feeding	Grazing, benthic-pelagic coupling	Water quality regulation	Through grazing shellfish can reduce phytoplankton concentrations. However, through positive feedbacks some species are less prone to grazing (by producing toxins or being a worse food source), thereby out competing the other species, resulting in blooms of these species.	Coastal health and quality
P189	Poirier et al. 2017	Epifaunal-suspension	Crab predation	Survival	NA	NA	They found a significant increase in the probability of oyster mortality when green crabs where presents. Also, the presence of native mussels affected this, the relationship was significantly stronger when no mussels were pressent. Mortality was mostly limited to small oysters (<40 mm).	NA
P19	Bolam et al. 2002	Infaunal-suspension	Species richness and biomass	NA	Sediment stabilisation and nutrient fluxes	NA	No effect found on nutrient fluxes and sediment stability	NA
P190	Kluger et al. 2017	Epifaunal-suspenion	Aquaculture	NA	Community composition alterations	Biodiversity	Under aquaculture scenarios, the amount of primary producers and consumers will drop with a 100 year scenario, while scallops biomass will increase, as well as secondary consumers.	Biological structuring
P190	Kluger et al. 2017	Epifaunal-suspension	NA	NA	Biomass production	Aquaculture	Bivalve aquaculture has become increasingly important for marine protein production and is an alternative to exploiting natural resources	Marine resources
P191	Saraiva et al. 2017	Epifaunal-suspension	Estuary morphology	Filter feeding, nutrient excretion	Water column filtration, nutrient recycling	Nutrient cycling, sediment biogeochemistry	Mussel beds contribute to nutrient cycling and sediment biogeochemistry in the model by removing phytoplankton from the water column, excreting ammonia and mineralizing OM.	Interaction
P192	Compton et al. 2017	Infaunal-suspension	Time	NA	Community composition alterations	NA	Changes in community composition are observed over time with a decrease in Mya arenaria in the estuary (causing a shift to worm dominated communities). In the outer Ems, C. edule was able to recruit succesfully in the latter part of the study	NA
P195	Barrios-O'Neill et al. 2017	Epifaunal-suspension	Predation	Mortality	Habitat provision	Food web structure	Non-consumptive interactions between apex skate and intermediate crabs cascade down to consumptive interactions between crabs and bivalves, significantly reducing bivalve mortality. However, skate only functioned as keystone where crabs foraged for bivalves in the absence of mature bivalve reef: where reef was present, bivalve mortality was not significantly different in the presence or absence o…	Biological structuring
P198	Gray 2016	Infaunal-suspension	Fishing closure	Population dynamics	NA	NA	Differences in densities, but not size compositions, of clams were evident between zones on the commercially fished and control beaches, but they were mostly apparent only across short (day and week) periods before, early and late harvesting, and thus were most likely pulse responses of clams to stochastic, non-fishing related events that acted independently across the different zones on each bea…	NA
P199	Lacoue-Labarthe et al. 2016	Infaunal-suspension, epifaunal-suspension	Ocean acidification, thermal stress	Growth, survival	Biomass production	Aquaculture, Production of food	Mediteranean bivalve yields have recently stabilized at around 180,000 t yr-1. The largest contribution is from Mediterranean mussels (roughly 2/3 of the yield), followed by japanese carpet shell and the pacific cuppped oyster. Ocean acidification, resulting in decreased pH have been shown to alter bivavle (shell and body) growth).	Marine resources
P2	Braeckman et al. 2011	Infaunal-suspension	Macrobenthic community composition	Bioturbation, bioirrigation, predation	Habitat engineering	Habitat provision, Foodweb structure	Macrobenthic engineering to sustain the smaller components of the food web by improving densities and biodiversity	Biological structuring
P20	Hohaia et al. 2014	Infaunal-deposit	Sedimentation	Bioturbation, burrowing behaviour	Sediment oxygenation	Sediment biogeochemistry	Hypothesise that conditioning of sediments by bioturbation can mediate negative effects of terrestrial sediment depostis on the recruits' burial behaviour.	Habitat modification
P200	Lewis, de Witt 2017	Infaunal-suspension	Macroalgal blooms	Growth, survival, burial behaviour	Biomass production	Production of food	As a result of green macroalgal mats, cockle emergence was higher with increased mat biomass. Mats evoked lateral movement, inhibited shell growth and increased mortality. This was mostly attributed to weighted barrier at the sediment surface, as determined in a lab experiment. Emergence from the sediment increase risk of mortality from both predation and physical distress from temperature. Reduc…	Marine resources
P201	McCartain et al. 2017	Infaunal-deposit	Sedimentation	Grazing, movement	Nutrient exchange, benthic-pelagic coupling	Sediment biogeochemistry	Thin deposits of mud (1-4 mm) altered the physical properties of the sediment by reducing hydraulic conductivity and caused subtle but significant changes in M. liliana behaviour. combined, these changes have the potentail to affect the functioning of marine sediments by modifying porewater exchange with the overlying water column.	Habitat modification
P202	Galimany et al. 2017	Epifaunal-suspension	Eutrophication	Filter feeding	Nutrient bioextraction	Water quality regulation, nutrient cycling	On the raft-scale (36m2) a total of 1.2 x 10^7 L water is filtered per day, resulting in a removal of 160 kg of particulate matter of which 12 kg is assimilated into animal tissue. These rafts yield a 1.7 x 103 g m-2 nitrogen removal rate, removing 41.3 kg nitrogen from the estuary when all bivalves would be harvested from the raft.	Coastal health and quality
P21	Guidetti & Boero 2004	Epifaunal-suspension	Fishery	Reef formation	Nursery role	Habitat provision, biodiversity	Illegal disruptive fisheries reduce the role as nursery habitat for rocky-reefs, affecting fish population dynamics (distribution patterns of adults and abundance of juveniles)	Biological structuring
P22	Maire et al. 2006	Infaunal-deposit	Food concentration	Burrowing behaviour, feeding behaviour	Sediment reworking	Sediment biogeochemistry	Biodiffusion was maximal at intermediate/high food concentration, affecting the OM availability in the sediment	Habitat modification
P23	Gedan et al. 2014	Epifaunal-suspension	Reef composition	Filter feeding	Water column filtration, turbidity reduction	Water quality regulation	The introduction of the two species increases the reduction in algae and therefore turbidity which improves water quality. As the two species occupy a different niche (mussels can filter picoplankton) they complement each other, except at low chla concentrations, where they compete.	Coastal health and quality
P29	Tornroos et al. 2015	Infaunal-deposit	Exposure	Feeding behaviour	Shifting food source	Food web structure	The study shows a shift in feeding plasticity (suspension/deposit feeding) in context-dependent situations (exposure)	Biological structuring
P3	Maire et al. 2010	Infaunal-deposit	Predator pressence	Burrowing behaviour, predator avoidance	Sediment reworking, feeding activity	Sediment biogeochemistry	In the presence of some predators, the behaviour of M. balthica changes significantly by burrowing deeper, thereby enhancing sediment reworking reducing feeding activity. This alters the sediment biogeochemsitry by affectign transport of OM to depths.	Habitat modification
P31	Coen & Bishop 2015	Bivalves	Parasitism	Shellfish mortality	Benthic pelagic coupling, denitrificaiton	Water quality regulation, nutrient cycling	Mortality events result in modification of physico-chemical environment through denitrification and nutrient assimilation and reduced water quality	Coastal health and quality
P32	Caldow et al. 2007	Infaunal-suspension	Invasive species	Growth	C and energy transfer	Food web structure	The invasive manila clam provides a new food source for shellfish-eating shorebirds, reducing their over-winter mortality	Biological structuring
P33	Savage et al. 2012	Infaunal-suspension	Trophic connections	NA	Trophic connections, nutrient subsidies	Biodiversity	The trophic connections affect biodiversity in coastal sites and the array of functional traits of the macrofaunal communtiy. The closer to the mouth of the estuary, the higher the contribution of resource subsidies to Dosinia spp.. Furthermore, size and density of large suspension feeding bivalves present at the sites affect the community composition and functional traits.	Biological structuring
P34	Dinesen & Morton 2014	Epifaunal-suspension	NA	Reef formation	Habitat engineering	Habitat provision	Horse mussel beds create habitat in 3 layers, 1) dense layer residing on shell debris, 2) mobile megafauna of grazers, predators and scavengers, 3) mobile/sedentary macrofauna living in crevices	Biological structuring
P35	Hoellein & Zarnoch	Epifaunal-suspension	NA	Filter feeding	OM decomposition and C and N transfer	Nutrient cycling and removal	Oyster densities affect OM deposition with highest deposition at high densities. Oysters did not affect any N pools or transforamtions. As nitrification and denitrification potential (DNP) were not related, oyster mediated increase in OM did not affect DNP (as C limitation was not its primary driver).	Coastal health and quality
P36	Hiebenthal et al. 2013	Epifaunal-suspension, Infaunal-suspension	Ocean acidification, thermal stress	Shell formation, growth	NA	Provision of food, provision of material	Temperature has a negative effect on condition index (affecting food provision), shell growth and thickness (provision of material), these effects were amplified in M. edulis under elevated pCO2	Marine resources
P37	Sara et al. 2014	Epifaunal-suspension	Climate change	Filter feeding	Water column filtration	NA	No ES are discussed in the paper. They however link climate change to changes in filtration rates of bivalves and found a breakpoint in clearance rate and respiration rates, which is the temperature threshold at the metabolic break where the metabolic function collapses. So first functions increase and are followed by a strong collapse at higher temperatures.	NA
P38	Compton et al. 2013	Infaunal-suspension	Median grain size, MPB biomass, exposure time	Community composition	Nutrient cycling, OM decomposition, food source for secondary consumers	Nutrient cycling and removal, food web structure	They don't focus on ES but point out the importance of these communities in the introduction for the provision of a number of ES (previous column). No connection between the delivery of these services and the change in community composition are made.	Interaction
P39	Byers et al. 2014	Epifaunal-suspension, infaunal-suspension	Predation and competition	Filter feeding	Water column filtration	Water quality regulation	Predation and competition had no effect on oyster filter feeding rates. Clams filtered less and were more sensitive to predators	Coastal health and quality
P4	Galimany et al. 2017	Epifaunal-suspension	Invasive species	Filter feeding	Water column filtration	Water quality regulation	Invasive mussel species was more efficient at feeding than native species, thereby outcompeting them. They had higher clearance, filtration, rejection, organic ingestion, and absorption rates, as well as higher rjection percentage and absorption efficiency. Both invasive and native species occupied a similar niche.	Coastal health and quality
P40	Karlson et al. 2016	Infaunal-suspension, infaunal-deposit	Community biodiversity	NA	OM decomposition, nutrient uptake	Food web structure	The study examined the influence of key shellfish on their uptake of nitrogen from macroalgae detritus (as a measure of EF and food web efficiency. However, 2 species, Macamona and a large polychaete dominated macroalgal nitrogen uptake. But per capita uptake rates were best explained by the density of a head downdeposit feeding capitellid, scavengers, and species/functional group diversity	Biological structuring
P41	Villeger et al. 2012	Infaunal-suspension	Intra- vs interspecies variability	Nutrient excretion	Nutrient recycling	Nutrient cycling and removal	Bivalves are shown to have a relatively low per capita excretion rates of nitrogen. The study found no effect of body mass on excretion rates for bivalves, but did find this for fish species. For the 3 bivalve species, C. edule had the highest per capita excreation rate, followed by L. lacteus and significantly lower excretion rates by R. decussatus.	Coastal health and quality
P43	Vinagre et al. 2015	Epifaunal-suspension	NA	NA	C and energy transfer	Food web structure	Bivalves are primary consumers and form an important link between primary producers and higher trophic levels. In rocky intertidal areas, 2 distinct patways can be identified, ie. Benthic and pelagic foodwebs, with a high benthic energy pathway	Biological structuring
P44	Kasoar et al. 2015	Epifaunal-suspension	Conservation (Ramsar) sites	NA	Habitat engineering	Habitat provision, biodiversity	Bivalve reef consists of large areas of biogenic habitat, dominated by living bivalves where the complex structure of hard shells supports a distinct community that is persistent through time	Biological structuring
P45	Bendell 2014	Infaunal-suspension	Aquaculture	NA	Community composition alterations	Biodiversity	The paper discusses the effect of aquaculture of infaunal shellfish (Venerupis philippinarum) on community composition	Biological structuring
P48	Phillippart et al. 2012	Epifaunal-suspension	Water temperature, feeding conditions, season, latitude	Reproductive cycles	Synchronised spawning events	Foodweb structure	They found synchronies in larval occurrence related to environmental conditions (relevant for bivalve larval survival) at large spatial scales from 100s to 1000s km. Changes in environmental conditions can have possible consequences on spawning event and hence the foodweb structure	Biological structuring
P49	Grant et al. 2007	Epifaunal-suspension	Aquaculture	Water column filtration, particle reduction	Water column filtration	Water quality regulation	Suspension feeding of particles and biodeposition of waste materials results in particle depletion of the water column which positively contributes to the control of water quality, particle dynamics and primary production	Coastal health and quality
P5	Ermgassen et al. 2013	Epifaunal-suspension	Size and water temperature	Filter feeding	Water column filtration	Water quality regulation	Filtration rates increase with water temperature and larger shellfish	Coastal health and quality
P50	Queiros et al. 2011	Infaunal-suspension	Invasive species	Bioturbation	Sediment reworking	Habitat provisioning, sediment biogeochemistry	The bioturbating manila clam can severely modify the functioning of invaded systems through their effect on sediment reworking, thereby providing variability in habitat characteristics and community composition. These effects are mediated by structuring vegetation, sediment granulometry and compaction, showing context dependency.	Interaction
P51	Yamamuro 2012	Infaunal-suspension, epifaunal-suspension	Herbice use	Filter feeding	Benthic-pelagic coupling	Nutrient cycling	The shift from seagrass to phytoplankton dominant system has caused the uptake of nutrients through filter feeding bivalves (benthic-pelagic coupling). The amount of nutrients removed by bivalve harvest from the system is similar to that previous from the eelgras harvest.	Coastal health and quality
P51	Yamamuro 2012	Infaunal-suspension, epifaunal-suspension	Herbice use	NA	Biomass production	Provision of food	The effect of a shift to a phytoplankton dominated system (opposed to the original eelgras dominated system), induced an increase in fishery yield of clam on one hand, and non-edible biofouling species on the other.	Marine resources
P52	Welsh et al. 2015	Infaunal-suspension	Density	Respiration, Nitrogen excretion	Sediment oxygen demand, N-regeneration, nitrification, denitrificaiton	Nutrient cycling, sediment biogeochemistry	Shellfish affected nutrient cycling and removal processes in the sediment mostly through their own metabolic activity and their effect on the bacteria that colonise them. Through their contribution to denitrification, they are a source of N2O emissions (especially over aquaculture/farming projects)	Interaction
P53	Toupoint et al. 2016	Infaunal-suspension, epifaunal-suspension	Aquaculture, recreational fishing	Recruitment	NA	Provision of food, aqauculture	Hand raking inhibited primary recruitment intensity, whereas aquaculture promoted primary recruitment intensity. The effect on recruitment efficiency was muted for both activites due to post-settlement processes.	Marine resources
P54	Christianen et al. 2017	Infaunal-suspension, Infaunal-deposit	Food source	Feeding behaviour	C and energy transfer	Foodweb structure	The main food sources for different benthic organisms are determined using stable isotope data over a large spatial scale with a high resolution. For key consumers, MPB was the main food source for hediste diversicolor and Limecola balthica (deposit feeders), while for cerastoderma edule the main energy contribution is from pelagic food sources but shows higher variability spatially. Overall, MPB…	Biological structuring
P56	Micheli & Peterson 1999	Epifaunal-suspension	Predation	Reef formation	Habitat engineering	Habitat provision	The study shows that benthic macroinvertebrate abundance was highest on oyster reefs that are seperated from vegetated habitat, as a result of lower predation pressure from crabs. They also found that juvenile bivalves (clams) had a higher survivorship in separated reefs than those in the proximity of salt marshes or seagrass.	Biological structuring
P58	Moreira et al. 2017	Epifaunal-suspension	Invasive species, thermal stress	Fitness and mortality	NA	NA	The study found that juveniles are more susceptible increases in temperature, with a higher mortality rate and anti-oxidant response, while adults were more tolerant. Also, the native C. brasiliana did better than the invasive species C. gigas.	NA
P59	Orlova et al. 2006	Epifaunal-suspension	Invasive species	Filter feeding	Water column filtration, nutrient recycling, benthic-pelagic coupling	Foodweb structure, biodiversity, nutrient cycling and removal	Invasive sessile seston-feeders (Zebra mussels) direclty (through grazing and water clearance) and indirectly (through recycling of nutrients) intereact with the other ecosystem components, which affect the structure of benthic and planktonic communities as well as benthic-pelagic coupling	Interaction
P6	Coen et al. 2007	Epifaunal-suspension	Reef restoration	Reef formation	Habitat engineering	Habitat provision	The formation of reefs can result in the creation of habitat for refugia, feeding and nesting	Biological structuring
P6	Coen et al. 2007	Epifaunal-suspension	Reef restoration	Filter feeding	Water column filtration and benthic-pelagic coupling	Water quality regulation	Reef restoration can result in a number of ES, including the top-down control on phytoplankton blooms, seston filtration, benthic-pelagic coupling, all affecting water quality in the estuary	Coastal health and quality
P61	Chust et al. 2013	Infaunal-suspension	Global change	Dispersal and mobility	Population connectivity	NA	C. edule shows a high degree of connectivity between population in a number of estuaries, likely due to the planktonic larval dispersal. The population structure is lacking, probably as a result of large effective population size. This indicate that they mave have a higher resilience capacity to moderate changes within their habitats.	NA
P63	Talmage & Gobler 2010	Infaunal-suspension	Ocean acidification	Growth, survival and condition of larvae	CaCO3 synthesis in shells	Carbon sequestration	Under lowest CO2 concentrations (i.e. pre industrial) larvae displayed highest rates of metamorphosis, growth and survival compared to individuals grown under present day concentrations and future scenarios.	Coastal health and quality
P64	Altieri 2008	Infaunal-suspension, epifaunal-suspension	Hypoxia, predation	Survival	NA	Provision of food	Hypoxia reduced predation on all experimental species but enhanced the long-term survivorship of only sufficiently hypoxia-tolerant prey tdue to periodic extreme conditions. Quahogs where the most succesful species as they had highest survival rate. Hypoxia disrupted predator-prey interactions, and caused other species to do poorly. Bivalve diversity decreased with increasing hypoxia, which leave…	Marine resources
P65	Mallela & Harrod 2008	Infaunal-suspension, epifaunal-suspension	Habitat complexity, eutrophication	Filter feeding	Tropich interactions	Foodweb structure	Results suggest that offshore production is fuelling intertidal foodwebs. They find spatial variation in food sources around the two islands.	Biological structuring
P66	Michaud et al. 2009	Infaunal-suspension, Infaunal-deposit	Key species composition	Bioturbation, bioirrigation	Sediment reworking	Sediment biogeochemistry, biodiversity	Most combinations of species involved positive interactions that increased net fluxes between the sediment-water interface. Most effects could be direclty linked to toal oxic sediment volumes and burrow volumes generated by the different species.	Interaction
P67	McKeon et al. 2015	Infaunal-suspension, Infaunal-deposit	Salinity	NA	Community composition alterations	NA	Results show that salinity is the main driver for changes in community composition of bivalves over time. They found the greatest diversity in higher salinity sites, while the greatest abundances at medium sites, and lowest diversity and abundances at the lowest sites	Biological structuring
P68	Jones et al. 2016	Infaunal-suspension	Mass mortality event	Filter feeding	Water column filtration	Foodweb structure, water quality regulation	Bivalves can affect the food web structure as they can exert both bottom-up and top-down control. The study didn't find a significant top-down control on the phytoplankton biomass in the estuary, but showed the importance of MPB in the system. In the study, the mass mortality event of bivalves was used to study the effect of reduced bivalve grazing on phytoplankton population in the system. They …	Interaction
P69	Bergstrom et al. 2015	Epifaunal-suspension	NA	Growth	Production yield	Provision of food	The study shows growth rates for mussels along the Swedish coast using models and data derived from growth experiments (transplanting mussels out for 2 months and measure their growth rates over this time frame). They identified the different percentage of coastline having low (53%), medium (32%), and high (15%) growth rates. This has implications for aquaculture operations and mitigation of eutr…	Marine resources
P70	Kent et al. 2017	Epifaunal-suspension	NA	Filter feeding, deposition	Sedimentation, benthic-pelagic coupling	Water quality regulation, nutrient cycling	Filter feeding acts to control coastal turbidity levels, and enhances biodeposition on biogenic reefs (related to settlement and faeces production) regulates nutrient cycling	Coastal health and quality
P70	Kent et al. 2017	Epifaunal-suspension	NA	Filter feeding, deposition	Sedimentation, benthic-pelagic coupling	Sediment stabilisation	Through reef accretion, horse mussels can contribute to sediment stabilisation	Habitat modification
P72	MacDonald & Ward 2009	Epifaunal-suspension	Seston concentration fluctuation, environmental variables	Filter feeding	Water column filtration	Water quality regulation	They found highest weight standardized clearance rates for mussels (compared to scallops) for the highest concentrations tested. Scallops respond to changed more consistently than mussels.	Coastal health and quality
P73	Kanaya 2014	Infaunal-suspension, Infaunal-deposit	Sediment properties, infauna diversity	Bioturbation	Sediment modification and reworking, ingestion and biodeposition	Sediment biogeochemistry, biodiversity	Bioturbators affect sediment characteristics through processes such as physical disturbance, sediment modification and ingestion (+ biodeposition). Total density differed significantly between treatmens, but species richness and H' did not. So overall bivalves had a non-existing or reducing effect on total density. However, certain species were affected by certain bivalves, with significant diffe…	Interaction
P74	Wilkie et al. 2013	Epifaunal-suspension	Disease impact	Survival	NA	Production of food	The study looks at the effect of marine disease (QX infection) on farmed and wild populations of oysters and find that wild populations (opposed to farmed ones) are minimally affected by the disease. However, diseases of aquaculture stocks have the capacit yto infect wild populations, posing a long term treat to wild populations	Marine resources
P76	Sebastiano et al. 2015	Epifaunal-suspension	Urban nitrogen input	Growth, survival	Bioassimilation of nitrogen in tissue and shell	Removal of pollutants, nutrient cycling	Eastern oysters were able to grow substantially and have minimal mortality over one growing season, with higher growth in Jamaica Bay.In the extreme case of total suitable habitat coverage, oysters could extract a total of 61% of nitrogen input. Aquaculture covering 5000 acres would take up 148% of the nitrogen input, which is encouraging because aquaculture leases are beginning to be awarded in …	Coastal health and quality
P76	Sebastiano et al. 2015	Epifaunal-suspension	Urban nitrogen input	Growth, survival	NA	Production of food	Eastern oysters were able to grow substantially and have minimal mortality over one growing season, with higher growth in Jamaica Bay.In the extreme case of total suitable habitat coverage, oysters could extract a total of 61% of nitrogen input. Aquaculture covering 5000 acres would take up 148% of the nitrogen input, which is encouraging because aquaculture leases are beginning to be awarded in …	Marine resources
P77	Dumbauld & McCoy 2015	Epifaunal-suspension	Oyster aquaculture	Reef formation, nutrient excretion, filter feeding	Community composition alterations	Food web structure	Oyster aquaculture has a negative effect on native seagrass Z. marina, but this impact is relatively small. Aquaculture type does not affect the presence of Z. marina, but the harvest method does, with lower Z. marina cover related to mechanical dredging.	Biological structuring
P78	Rossi et al. 2007	Infaunal-suspension, Infaunal-deposit	Human trampling	Survival	Community composition alterations	Food web structure, sediment biogeochemistry	Tramping changed distribution and population dynamics of M. balthica and C. edule. It impacted negatively on adults as a result of asphyxia, but also increased recruitment of juvenile M. balthica.	Interaction
P79	Glaspie & Seitz 2017	Infaunal-suspension, Infaunal-deposit, epifaunal suspension	Habitat loss	Reef formation, survival	Habitat engineering, community composition	Habitat provision	Chesapeake Bay bivalves interacted with habitat and predators differently depending on the bivalves' feeding mode, predator defense strategy, and living position. The group most at risk are the thin-shelled suspension-feeding bivalves that live near the sedimetn surface, either as shallow-burrowing infauna or epifauna. Oyster shell habitat provided habitat for armored bivalves occuring at great d…	Biological structuring
P8	Jones et al. 2011	Infaunal-suspension	Sedimentation	Filter feeding, bioturbation	Benthic primary production, nutrient cycling	Nutrient cycling and removal	Overall found higher GPP and ammonium uptake in sandy sites (compared to mud-sandy sites) with the addition of cockles	Coastal health and quality
P80	McLeod et al. 2012	Epifaunal-suspension	Sedimentation, overfishing	Survival, growth, recruitment	Habitat engineering	NA	The study found that mussels were able to survive and live in FOT, and there was no difference between sites related to sedimentation for both growth and survival. However, the condition index was higher at the clean site compared to the turbid sites.	Habitat modification
P81	Clare et al. 2016	Infaunal-suspension	Key species density	Bioturbation, bioirrigation	Sediment reworking	Sediment biogeochemistry	Increased density negatively affected RPD depth, by causing the denity of a functionally dominant species (C. volutator) to decline. The influence of density dependent interspcific interactions (among macroinfauna) on RPD depth became increasingly positive with time.	Habitat modification
P82	Premo & Tyler 2013	Infaunal-suspension	Predator pressence	Bioturbation, filter feeding	sediment reworking, benthic-pelagic coupling	Nutrient cycling, sediment biogeochemistry	Sediment oxygen consumption increases 3-4x from respiration and biodeposits decay. Also an increase in sediment release of ammonium from remineralization of biodeposits and excretion. Rates were lower when predators were present, suggesting an overestimation of the influence of the species on benthic EF.	Interaction
P84	Eriksson et al. 2010	Epifaunal-suspension, Infaunal-suspension, Infaunal deposit	Human disturbance	Bioturbation, reef formation, filter feeding	Habitat engineering, facilitated particle settlement	Sediment stabilisation	They show that the previous state with high densities of bivalve species (oysters, mussels and cockles) resulted in a stabilizing effect on sediment characteristics, while a shift to deposit feeders (Arenicola marina) resulted in sediment destabilisation. This was caused by a combination of exploitation of bivalves and mechanical disturbances.	Habitat modification
P86	Kluger et al. 2016	Epifaunal-suspension	Scallop cultivation	Reef formation	Community composition alterations	Biodiversity	Scallops significantly change the community assemblages, decreasing benthic biodiversity and species evenness. They found some indication of a shift toward hard-bottom-associated species in the culture state.	Biological structuring
P86	Kluger et al. 2016	Epifaunal-suspension	Scallop cultivation	NA	NA	Production of food	Annual export revenues of the Sechura Bay scallop production is about US$158 million and emplyes 25000 people.	Marine resources
P88	Cardoso et al. 2008	Infaunal-suspension	Extreme flooding, eutrophication	NA	Community composition alterations	Biodiversity	The combination of eutrophication and flooding (in the eutrophication recovery phase) has severe effect on the sturcture and functioning of the macrobenthic community (decline in total biomass, species richness, and suspension feeders).	Biological structuring
P89	Ermgassen et al. 2013	Epifaunal-suspension	Oyster reef declines	Filter feeding	Water column filtration	Water quality regulation	Depending on the size of the oyster reef, the model predicts how long it takes for the oyster population to filter the estuaries volume (residence time). They found a 80% decline in filtering capacity comparing the past and present situations.	Coastal health and quality
P9	Byron et al. 2015	Epifaunal-suspension	NA	Growth	Biomass production	Provision of food	Aquaculture example	Marine resources
P90	Chapman et al. 2013	Infaunal-suspension	Sediment contamination	NA	Bioindicators	Removal of pollutants	Certain bivalves in estuaries can be used as indicators of toxicity.	Coastal health and quality
P91	Montes et al. 2012	Epifaunal-suspension	Engineered nanoparticles contamination	Filter feeding	Biotransformation and bioavailability of contaminants	Removal of pollutants	Marine suspension feeders have a potential role in the biotransformation of ENPs, by biotransforamtion of contaminants affecting their bioavailability	Coastal health and quality
P92	Kent et al. 2017	Epifaunal-suspension	NA	Reef formation	Habitat engineering	Habitat provision, biodiversity	M. modiolus reefs support a high abundance of megafaunal species compared to other habitats, including commercially valuable shellfish. M. modiolus reefs essential fish habitats for A. opercularis and B. undatum, which highlights their value in providing ES.	Biological structuring
P94	van der Zee et al. 2015	Epifaunal-suspension	Exposure	Reef formation	Habitat engineering	Habitat provision, sediment stabilisation, biodiversity	Anti-erosion coir mats (simulating stable sediments) increased infaunal community species richness and trophic diversity. Mussel addition could increase the diversity further (depending on the site) and caused a shift in infaunal community composition. Mussel addition did strongly stimulate the epifaunal community by increasing substrate availability.	Interaction
P96	Lohrer et al. 2010	Infaunal-suspension, infaunal-deposit	Defaunation (smothering)	Bioturbation	Productivity, ammonium efflux	Sediment biogeochemistry, nutrient cycling	Bioturbation by macrofauna facilitates the realease of ammonium from the sediment (rather than diffusion only). GPP is linked to efflux of ammonium for microphytes. The sites with large austrovenus before defaunation showed slowest recovery and therefore has the biggest impact on EF.	Interaction
P97	Lohrer et al. 2012	Infaunal-suspension	Heavy metal contamination	NA	Productivity, community respiration, ammonium efflux	Sediment biogeochemistry, nutrient cycling	Macrofaunal (Austrovenus) biomass increase results in decreasess in NPP and community respiration, and increases in NH4+ flux. The overall finding is that these relations are weakened (or decoupled) with high levels of contaminant stress.	Interaction
P99	Sospedra et al. 2017	Infaunal-suspension	Density	bioturbation, filter feeding	Nutrient exchange, benthic metabolism	Sediment biogeochemistry, nutrient cyling	S. substruncata influences EF as with increased density, the DO uptake and DIN relaease increase.	Interaction

## Sheet: References
Review ID	Author	Year	Title	Journal	Volume	Issue	Begin	End	DOI	ISSN
P2	Braeckman, U; Van Colen, C; Soetaert, K; Vincx, M; Vanaverbeke, J	2011	Contrasting macrobenthic activities differentially affect nematode density and diversity in a shallow subtidal marine sediment	MARINE ECOLOGY PROGRESS SERIES	422		179	+	10.3354/meps08910	0171-8630
P3	Maire, O; Merchant, JN; Bulling, M; Teal, LR; Gremare, A; Duchene, JC; Solan, M	2010	Indirect effects of non-lethal predation on bivalve activity and sediment reworking	JOURNAL OF EXPERIMENTAL MARINE BIOLOGY AND ECOLOGY	395	2017-02-01	30	36	10.1016/j.jembe.2010.08.004	0022-0981
P4	Galimany, E; Freeman, CJ; Lunt, J; Domingos, A; Sacks, P; Walters, L	2017	Feeding competition between the native oyster Crassostrea virginica and the invasive mussel Mytella charruana	MARINE ECOLOGY PROGRESS SERIES	564		57	66	10.3354/meps11976	0171-8630
P5	Ermgassen, PSEZ; Gray, MW; Langdon, CJ; Spalding, MD; Brumbaugh, RD	2013	Quantifying the historic contribution of Olympia oysters to filtration in Pacific Coast (USA) estuaries and the implications for restoration objectives	AQUATIC ECOLOGY	47	2	149	161	10.1007/s10452-013-9431-6	1386-2588
P6	Coen, LD; Brumbaugh, RD; Bushek, D; Grizzle, R; Luckenbach, MW; Posey, MH; Powers, SP; Tolley, SG	2007	Ecosystem services related to oyster restoration	MARINE ECOLOGY PROGRESS SERIES	341		303	307	10.3354/meps341299	0171-8630
P8	Jones, HFE; Pilditch, CA; Bruesewitz, DA; Lohrer, AM	2011	Sedimentary Environment Influences the Effect of an Infaunal Suspension Feeding Bivalve on Estuarine Ecosystem Function	PLOS ONE	6	10			10.1371/journal.pone.0027065	1932-6203
P9	Byron, CJ; Jin, D; Dalton, TM	2015	An Integrated ecological-economic modeling framework for the sustainable management of oyster farming	AQUACULTURE	447		15	22	10.1016/j.aquaculture.2014.08.030	0044-8486
P10	Galimany, E; Lunt, J; Freeman, CJ; Reed, S; Segura-Garcia, I; Paul, VJ	2017	Feeding behavior of eastern oysters Crassostrea virginica and hard clams Mercenaria mercenaria in shallow estuaries	CONTINENTAL SHELF RESEARCH	106		97	106	10.1016/j.csr.2015.07.004	0278-4343
P11	Burge, CA; Closek, CJ; Friedman, CS; Groner, ML; Jenkins, CM; Shore-Maggiok, A; Welsh, JE	2016	The Use of Filter-feeders to Manage Disease in a Changing World	ENVIRONMENTAL SCIENCE & TECHNOLOGY	43	6	2118	2123	10.1021/es802175k	0013-936X
P12	Deng, F; Ma, Y; Li, J; Wang, YZ; Yan, QP; Yan, XZ; Lin, M	2015	Archaeal community structure and response to ark shell bioturbation in typical intertidal mudflats, Southeast coast of China	JOURNAL OF SHELLFISH RESEARCH	28	1	147	161	10.2983/035.028.0105	0730-8000
P14	Hewitt, JE; Anderson, MJ; Hickey, CW; Kelly, S; Thrush, SF	2009	Enhancing the Ecological Significance of Sediment Contamination Guidelines through Integration with Community Analysis	ECOLOGICAL APPLICATIONS	26	1	249	263	10.1890/14-0716	1051-0761
P15	Brumbaugh, RD; Coen, LD	2009	Contemporary approaches for small-scale oyster reef restoration to address substrate versus recruitment limitation: a review and comments relevant for the olympia oyster, ostrea lurida Carpenter 1864	JOURNAL OF THE MARINE BIOLOGICAL ASSOCIATION OF THE UNITED KINGDOM	95	6	1163	1172	10.1017/S0025315415000132	0025-3154
P16	Gittman, RK; Peterson, CH; Currin, CA; Fodrie, FJ; Piehler, MF; Bruno, JF	2016	Living shorelines can enhance the nursery role of threatened estuarine habitats	ENVIRONMENTAL SCIENCE AND POLLUTION RESEARCH	23	13	12645	12661	10.1007/s11356-015-5339-0	0944-1344
P17	Humphreys, J; Harris, MRC; Herbert, RJH; Farrell, P; Jensen, A; Cragg, SM	2015	Introduction, dispersal and naturalization of the Manila clam Ruditapes philippinarum in British estuaries, 1980-2010	ECOLOGICAL MONOGRAPHS	72	4	599	615	10.1890/0012-9615(2002)072[0599:DBAEPI]2.0.CO;2	0012-9615
P18	Franzo, A; Auriemma, R; Nasi, F; Vojvoda, J; Pallavicini, A; Cibic, T; Del Negro, P	2016	Benthic ecosystem functioning in the severely contaminated Mar Piccolo of Taranto (Ionian Sea, Italy): focus on heterotrophic pathways	ENVIRONMENTAL SCIENCE AND POLLUTION RESEARCH	23	13	12645	12661	10.1007/s11356-015-5339-0	0944-1344
P19	Bolam, SG; Fernandes, TF; Huxham, M	2002	Diversity, biomass, and ecosystem processes in the marine benthos	ECOLOGICAL MONOGRAPHS	72	4	599	615	10.1890/0012-9615(2002)072[0599:DBAEPI]2.0.CO;2	0012-9615
P20	Hohaia, A; Vopel, K; Pilditch, CA	2014	Thin terrestrial sediment deposits on intertidal sandflats: effects on pore-water solutes and juvenile bivalve burial behaviour	BIOGEOSCIENCES	11	8	2225	2235	10.5194/bg-11-2225-2014	1726-4170
P21	Guidetti, P; Boero, F	2004	Desertification of Mediterranean rocky reefs caused by date-mussel, Lithophaga lithophaga (Mollusca : Bivalvia), fishery: effects on adult and juvenile abundance of a temperate fish	MARINE POLLUTION BULLETIN	48	2017-10-09	978	982	10.1016/j.marpolbul.2003.12.006	0025-326X
P22	Maire, O; Duchene, JC; Rosenberg, R; de Mendonca, JB; Gremare, A	2006	Effects of food availability on sediment reworking in Abra ovata and A. nitida	MARINE ECOLOGY PROGRESS SERIES	319		135	153	10.3354/meps319135	0171-8630
P23	Gedan, KB; Kellogg, L; Breitburg, DL	2014	Accounting for Multiple Foundation Species in Oyster Reef Restoration Benefits	RESTORATION ECOLOGY	22	4	517	524	10.1111/rec.12107	1061-2971
P29	Tornroos, A; Nordstrom, MC; Aarnio, K; Bonsdorff, E	2015	Environmental context and trophic trait plasticity in a key species, the tellinid clam Macoma balthica L.	JOURNAL OF EXPERIMENTAL MARINE BIOLOGY AND ECOLOGY	472		32	40	10.1016/j.jembe.2015.06.015	0022-0981
P31	Coen, LD; Bishop, MJ	2015	The ecology, evolution, impacts and management of host-parasite interactions of marine molluscs	JOURNAL OF INVERTEBRATE PATHOLOGY	131		177	211	10.1016/j.jip.2015.08.005	0022-2011
P32	Caldow, RWG; Stillman, RA; Durell, SEALVD; West, AD; McGrorty, S; Goss-Custard, JD; Wood, PJ; Humphreys, J	2007	Benefits to shorebirds from invasion of a non-native shellfish	PROCEEDINGS OF THE ROYAL SOCIETY B-BIOLOGICAL SCIENCES	274	1616	1449	1455	10.1098/rspb.2007.0072	0962-8452
P33	Savage, C; Thrush, SF; Lohrer, AM; Hewitt, JE	2012	Ecosystem Services Transcend Boundaries: Estuaries Provide Resource Subsidies and Influence Functional Diversity in Coastal Benthic Communities	PLOS ONE	7	8			10.1371/journal.pone.0042708	1932-6203
P34	Dinesen, GE; Morton, B	2014	Review of the functional morphology, biology and perturbation impacts on the boreal, habitat-forming horse mussel Modiolus modiolus (Bivalvia: Mytilidae: Modiolinae)	MARINE BIOLOGY RESEARCH	10	9	845	870	10.1080/17451000.2013.866250	1745-1000
P35	Hoellein, TJ; Zarnoch, CB	2014	Effect of eastern oysters (Crassostrea virginica) on sediment carbon and nitrogen dynamics in an urban estuary	ECOLOGICAL APPLICATIONS	24	2	271	286	10.1890/12-1798.1	1051-0761
P36	Hiebenthal, C; Philipp, EER; Eisenhauer, A; Wahl, M	2013	Effects of seawater pCO(2) and temperature on shell growth, shell stability, condition and cellular stress of Western Baltic Sea Mytilus edulis (L.) and Arctica islandica (L.)	MARINE BIOLOGY	160	8	2073	2087	10.1007/s00227-012-2080-9	0025-3162
P37	Sara, G; Milanese, M; Prusina, I; Sara, A; Angel, DL; Glamuzina, B; Nitzan, T; Freeman, S; Rinaldi, A; Palmeri, V; Montalto, V; Lo Martire, M; Gianguzza, P; Arizza, V; Lo Brutto, S; De Pirro, M; Helmuth, B; Murray, J; De Cantis, S; Williams, GA	2014	The impact of climate change on mediterranean intertidal communities: losses in coastal ecosystem integrity and services	REGIONAL ENVIRONMENTAL CHANGE	14		S5	S17	10.1007/s10113-012-0360-z	1436-3798
P38	Compton, TJ; Holthuijsen, S; Koolhaas, A; Dekinga, A; ten Horn, J; Smith, J; Galama, Y; Brugge, M; van der Wal, D; van der Meer, J; van der Veer, HW; Piersma, T	2013	Distinctly variable mudscapes: Distribution gradients of intertidal macrofauna across the Dutch Wadden Sea	JOURNAL OF SEA RESEARCH	82		103	116	10.1016/j.seares.2013.02.002	1385-1101
P39	Byers, JE; Smith, RS; Weiskel, HW; Robertson, CY	2014	A Non-Native Prey Mediates the Effects of a Shared Predator on an Ecosystem Service	PLOS ONE	9	4			10.1371/journal.pone.0093969	1932-6203
P40	Karlson, AML; Niemand, C; Savage, C; Pilditch, CA	2016	Density of Key-Species Determines Efficiency of Macroalgae Detritus Uptake by Intertidal Benthic Communities	PLOS ONE	11	7			10.1371/journal.pone.0158785	1932-6203
P41	Villeger, S; Ferraton, F; Mouillot, D; de Wit, R	2012	Nutrient recycling by coastal macrofauna: intra- versus interspecific differences	MARINE ECOLOGY PROGRESS SERIES	452		297	303	10.3354/meps09610	0171-8630
P43	Vinagre, C; Mendonca, V; Narciso, L; Madeira, C	2015	Food web of the intertidal rocky shore of the west Portuguese coast - Determined by stable isotope analysis	MARINE ENVIRONMENTAL RESEARCH	110		53	60	10.1016/j.marenvres.2015.07.016	0141-1136
P44	Kasoar, T; Ermgassen, PSEZ; Carranza, A; Hancock, B; Spalding, M	2015	New opportunities for conservation of a threatened biogenic habitat: a worldwide assessment of knowledge on bivalve-reef representation in marine and coastal Ramsar Sites	MARINE AND FRESHWATER RESEARCH	66	11	981	988	10.1071/MF14306	1323-1650
P45	Bendell, LI	2014	Community composition of the intertidal in relation to the shellfish aquaculture industry in coastal British Columbia, Canada	AQUACULTURE	433		384	394	10.1016/j.aquaculture.2014.06.027	0044-8486
P48	Philippart, CJM; Amaral, A; Asmus, R; van Bleijswijk, J; Bremner, J; Buchholz, F; Cabanellas-Reboredo, M; Catarino, D; Cattrijsse, A; Charles, F; Comtet, T; Cunha, A; Deudero, S; Duchene, JC; Fraschetti, S; Gentil, F; Gittenberger, A; Guizien, K; Goncalves, JM; Guarnieri, G; Hendriks, I; Hussel, B; Vieira, RP; Reijnen, BT; Sampaio, I; Serrao, E; Pinto, IS; Thiebaut, E; Viard, F; Zuur, AF	2012	Spatial synchronies in the seasonal occurrence of larvae of oysters (Crassostrea gigas) and mussels (Mytilus edulis/galloprovincialis) in European coastal waters	ESTUARINE COASTAL AND SHELF SCIENCE	108		52	63	10.1016/j.ecss.2012.05.014	0272-7714
P49	Grant, J; Bugden, G; Horne, E; Archambault, MC; Carreau, M	2007	Remote sensing of particle depletion by coastal suspension-feeders	CANADIAN JOURNAL OF FISHERIES AND AQUATIC SCIENCES	64	3	387	390	10.1139/F07-021	0706-652X
P50	Queiros, AD; Hiddink, JG; Johnson, G; Cabral, HN; Kaiser, MJ	2011	Context dependence of marine ecosystem engineer invasion impacts on benthic ecosystem functioning	BIOLOGICAL INVASIONS	13	5	1059	1075	10.1007/s10530-011-9948-3	1387-3547
P51	Yamamuro, M	2012	Herbicide-induced macrophyte-to-phytoplankton shifts in Japanese lagoons during the last 50 years: consequences for ecosystem services and fisheries	HYDROBIOLOGIA	699	1	5	19	10.1007/s10750-012-1150-9	0018-8158
P52	Welsh, DT; Nizzoli, D; Fano, EA; Viaroli, P	2015	Direct contribution of clams (Ruditapes philippinarum) to benthic fluxes, nitrification, denitrification and nitrous oxide emission in a farmed sediment	ESTUARINE COASTAL AND SHELF SCIENCE	154		84	93	10.1016/j.ecss.2014.12.021	0272-7714
P53	Toupoint, N; Barbier, P; Tremblay, R; Archambault, P; McKindsey, CW; Winkler, G; Meziane, T; Olivier, F	2016	Influence of intertidal recreational fisheries and 'bouchot' mussel culture on bivalve recruitment	MARINE ENVIRONMENTAL RESEARCH	117		1	12	10.1016/j.marenvres.2016.03.006	0141-1136
P54	Christianen, MJA; Middelburg, JJ; Holthuijsen, SJ; Jouta, J; Compton, TJ; van der Heide, T; Piersma, T; Damste, JSS; van der Veer, HW; Schouten, S; Olff, H	2017	Benthic primary producers are key to sustain the Wadden Sea food web: stable carbon isotope analysis at landscape scale	ECOLOGY	98	6	1498	1512	10.1002/ecy.1837	0012-9658
P56	Micheli, F; Peterson, CH	1999	Estuarine vegetated habitats as corridors for predator movements	CONSERVATION BIOLOGY	13	4	869	881	10.1046/j.1523-1739.1999.98233.x	0888-8892
P58	Moreira, A; Figueira, E; Pecora, IL; Soares, AMVM; Freitas, R	2017	Biochemical alterations in native and exotic oyster species in Brazil in response to increasing temperature	COMPARATIVE BIOCHEMISTRY AND PHYSIOLOGY C-TOXICOLOGY & PHARMACOLOGY	191		183	193	10.1016/j.cbpc.2016.10.008	1532-0456
P59	Orlova, MI; Telesh, IV; Berezina, NA; Antsulevich, AE; Maximov, AA; Litvinchuk, LF	2006	Effects of nonindigenous species on diversity and community functioning in the eastern Gulf of Finland (Baltic Sea)	HELGOLAND MARINE RESEARCH	60	2	98	105	10.1007/s10152-006-0026-7	1438-387X
P61	Chust, G; Albaina, A; Aranburu, A; Borja, A; Diekmann, OE; Estonba, A; Franco, J; Garmendia, JM; Iriondo, M; Muxika, I; Rendo, F; Rodriguez, JG; Ruiz-Larranaga, O; Serrao, EA; Valle, M	2013	Connectivity, neutral theories and the assessment of species vulnerability to global change in temperate estuaries	ESTUARINE COASTAL AND SHELF SCIENCE	131		52	63	10.1016/j.ecss.2013.08.005	0272-7714
P63	Talmage, SC; Gobler, CJ	2010	Effects of past, present, and future ocean carbon dioxide concentrations on the growth and survival of larval shellfish	PROCEEDINGS OF THE NATIONAL ACADEMY OF SCIENCES OF THE UNITED STATES OF AMERICA	107	40	17246	17251	10.1073/pnas.0913804107	0027-8424
P64	Altieri, AH	2008	DEAD ZONES ENHANCE KEY FISHERIES SPECIES BY PROVIDING PREDATION REFUGE	ECOLOGY	89	10	2808	2818	10.1890/07-0994.1	0012-9658
P65	Mallela, J; Harrod, C	2008	delta C-13 and delta N-15 reveal significant differences in the coastal foodwebs of the seas surrounding Trinidad and Tobago	MARINE ECOLOGY PROGRESS SERIES	368		41	51	10.3354/meps07589	0171-8630
P66	Michaud, E; Desrosiers, G; Aller, RC; Mermillod-Blondin, F; Sundby, B; Stora, G	2009	Spatial interactions in the Macoma balthica community control biogeochemical fluxes at the sediment-water interface and microbial abundances	JOURNAL OF MARINE RESEARCH	67	1	43	70		0022-2402
P67	McKeon, CS; Tunberg, BG; Johnston, CA; Barshis, DJ	2015	Ecological drivers and habitat associations of estuarine bivalves	PEERJ	3				10.7717/peerj.1348	2167-8359
P68	Jones, HFE; Pilditch, CA; Hamilton, DP; Bryan, KR	2016	Impacts of a bivalve mass mortality event on an estuarine food web and bivalve grazing pressure	NEW ZEALAND JOURNAL OF MARINE AND FRESHWATER RESEARCH	51	3	370	392	10.1080/00288330.2016.1245200	0028-8330
P69	Bergstrom, P; Lindegarth, S; Lindegarth, M	2015	Modeling and predicting the growth of the mussel, Mytilus edulis: implications for planning of aquaculture and eutrophication mitigation	ECOLOGY AND EVOLUTION	5	24	S920	S933	10.1002/ece3.1823	2045-7758
P70	Kent, FEA; Last, KS; Harries, DB; Sanderson, WG	2017	In situ biodeposition measurements on a Modiolus modiolus (horse mussel) reef provide insights into ecosystem services	ESTUARINE COASTAL AND SHELF SCIENCE	184		151	157	10.1016/j.ecss.2016.11.014	0272-7714
P72	MacDonald, BA; Ward, JE	2009	Feeding activity of scallops and mussels measured simultaneously in the field: Repeated measures sampling and implications for modelling	JOURNAL OF EXPERIMENTAL MARINE BIOLOGY AND ECOLOGY	371	1	42	50	10.1016/j.jembe.2009.01.002	0022-0981
P73	Kanaya, G	2014	Effects of infaunal bivalves on associated macrozoobenthic communities in estuarine soft-bottom habitats: A bivalve addition experiment in a brackish lagoon	JOURNAL OF EXPERIMENTAL MARINE BIOLOGY AND ECOLOGY	457		180	189	10.1016/j.jembe.2014.03.022	0022-0981
P74	Wilkie, EM; Bishop, MJ; O'Connor, WA; McPherson, RG	2013	Status of the Sydney rock oyster in a disease-afflicted estuary: persistence of wild populations despite severe impacts on cultured counterparts	MARINE AND FRESHWATER RESEARCH	64	3	267	276	10.1071/MF13010	1323-1650
P76	Sebastiano, D; Levinton, JS; Doall, M; Kamath, S	2015	USING A SHELLFISH HARVEST STRATEGY TO EXTRACT HIGH NITROGEN INPUTS IN URBAN AND SUBURBAN COASTAL BAYS: PRACTICAL AND ECONOMIC IMPLICATIONS	JOURNAL OF SHELLFISH RESEARCH	34	2	573	583	10.2983/035.034.0242	0730-8000
P77	Dumbauld, BR; McCoy, LM	2015	Effect of oyster aquaculture on seagrass Zostera marina at the estuarine landscape scale in Willapa Bay, Washington (USA)	AQUACULTURE ENVIRONMENT INTERACTIONS	7	1	29	47	10.3354/aei00131	1869-215X
P78	Rossi, F; Forster, RM; Montserrat, F; Ponti, M; Terlizzi, A; Ysebaert, T; Middelburg, JJ	2007	Human trampling as short-term disturbance on intertidal mudflats: effects on macrofauna biodiversity and population dynamics of bivalves	MARINE BIOLOGY	151	6	2077	2090	10.1007/s00227-007-0641-0	0025-3162
P79	Glaspie, CN; Seitz, RD	2017	Role of habitat and predators in maintaining functional diversity of estuarine bivalves	MARINE ECOLOGY PROGRESS SERIES	570		113	125	10.3354/meps12103	0171-8630
P80	McLeod, IM; Parsons, DM; Morrison, MA; Le Port, AS; Taylor, RB	2012	Factors affecting the recovery of soft-sediment mussel reefs in the Firth of Thames, New Zealand	MARINE AND FRESHWATER RESEARCH	63	1	78	83	10.1071/MF11083	1323-1650
P81	Clare, DS; Spencer, M; Robinson, LA; Frid, CLJ	2016	Species densities, biological interactions and benthic ecosystem functioning: an in situ experiment	MARINE ECOLOGY PROGRESS SERIES	547		149	161	10.3354/meps11650	0171-8630
P82	Premo, KM; Tyler, AC	2013	Threat of predation alters the ability of benthic invertebrates to modify sediment biogeochemistry and benthic microalgal abundance	MARINE ECOLOGY PROGRESS SERIES	494		29	39	10.3354/meps10561	0171-8630
P84	Eriksson, BK; van der Heide, T; van de Koppel, J; Piersma, T; van der Veer, HW; Olff, H	2010	Major Changes in the Ecology of the Wadden Sea: Human Impacts, Ecosystem Engineering and Sediment Dynamics	ECOSYSTEMS	13	5	752	764	10.1007/s10021-010-9352-3	1432-9840
P86	Kluger, LC; Taylor, MH; Rivera, EB; Silva, ET; Wolff, M	2016	Assessing the ecosystem impact of scallop bottom culture through a community analysis and trophic modelling approach	MARINE ECOLOGY PROGRESS SERIES	547		121	135	10.3354/meps11652	0171-8630
P88	Cardoso, PG; Raffaelli, D; Lillebo, AI; Verdelhos, T; Pardal, MA	2008	The impact of extreme flooding events and anthropogenic stressors on the macrobenthic communities' dynamics	ESTUARINE COASTAL AND SHELF SCIENCE	76	3	553	565	10.1016/j.ecss.2007.07.026	0272-7714
P89	Ermgassen, PSEZ; Spalding, MD; Grizzle, RE; Brumbaugh, RD	2013	Quantifying the Loss of a Marine Ecosystem Service: Filtration by the Eastern Oyster in US Estuaries	ESTUARIES AND COASTS	36	1	36	43	10.1007/s12237-012-9559-y	1559-2723
P90	Chapman, PM; Wang, FY; Caeiro, SS	2013	Assessing and managing sediment contamination in transitional waters	ENVIRONMENT INTERNATIONAL	55		71	91	10.1016/j.envint.2013.02.009	0160-4120
P91	Montes, MO; Hanna, SK; Lenihan, HS; Keller, AA	2012	Uptake, accumulation, and biotransformation of metal oxide nanoparticles by a marine suspension-feeder	JOURNAL OF HAZARDOUS MATERIALS	225		139	145	10.1016/j.jhazmat.2012.05.009	0304-3894
P92	Kent, FEA; Mair, JM; Newton, J; Lindenbaum, C; Porter, JS; Sanderson, WG	2017	Commercially important species associated with horse mussel (Modiolus modiolus) biogenic reefs: A priority habitat for nature conservation and fisheries benefits	MARINE POLLUTION BULLETIN	118	2017-02-01	71	78	10.1016/j.marpolbul.2017.02.051	0025-326X
P94	van der Zee, EM; Tielens, E; Holthuijsen, S; Donadi, S; Eriksson, BK; van der Veer, HW; Piersma, T; Olff, H; van der Heide, T	2015	Habitat modification drives benthic trophic diversity in an intertidal soft-bottom ecosystem	JOURNAL OF EXPERIMENTAL MARINE BIOLOGY AND ECOLOGY	465		41	48	10.1016/j.jembe.2015.01.001	0022-0981
P96	Lohrer, AM; Halliday, NJ; Thrush, SF; Hewitt, JE; Rodil, IF	2010	Ecosystem functioning in a disturbance-recovery context: Contribution of macrofauna to primary production and nutrient release on intertidal sandflats	JOURNAL OF EXPERIMENTAL MARINE BIOLOGY AND ECOLOGY	390	1	6	13	10.1016/j.jembe.2010.04.035	0022-0981
P97	Lohrer, AM; Townsend, M; Rodil, IF; Hewitt, JE; Thrush, SF	2012	Detecting shifts in ecosystem functioning: The decoupling of fundamental relationships with increased pollutant stress on sandflats	MARINE POLLUTION BULLETIN	64	12	2761	2769	10.1016/j.marpolbul.2012.09.012	0025-326X
P99	Sospedra, J; Falco, S; Morata, T; Rodilla, M	2017	Influence of Organic Enrichment and Spisula subtruncata (da Costa, 1778) on Oxygen and Nutrient Fluxes in Fine Sand Sediments	ESTUARIES AND COASTS	40	3	726	740	10.1007/s12237-016-0174-1	1559-2723
P100	Pratt, DR; Lohrer, AM; Thrush, SF; Hewitt, JE; Townsend, M; Cartner, K; Pilditch, CA; Harris, RJ; van Colen, C; Rodil, IF	2015	Detecting Subtle Shifts in Ecosystem Functioning in a Dynamic Estuarine Environment	PLOS ONE	10	7			10.1371/journal.pone.0133914	1932-6203
P103	Dudas, SE; Dower, JF; Anholt, BR	2007	Invasion dynamics of the varnish clam (Nuttallia obscurata): A matrix demographic modeling approach	ECOLOGY	88	8	2084	2093	10.1890/06-1216.1	0012-9658
P105	Skilleter, GA; Pryor, A; Miller, S; Cameron, B	2006	Detecting the effects of physical disturbance on benthic assemblages in a subtropical estuary: A Beyond BACI approach	JOURNAL OF EXPERIMENTAL MARINE BIOLOGY AND ECOLOGY	338	2	271	287	10.1016/j.jembe.2006.06.016	0022-0981
P108	Winberg, PC; Davis, AR	2014	Ecological response to MPA zoning following cessation of bait harvesting in an estuarine tidal flat	MARINE ECOLOGY PROGRESS SERIES	517		171	180	10.3354/meps11052	0171-8630
P109	Li, YQ; Meseck, SL; Dixon, MS; Rivara, K; Wikfors, GH	2012	Temporal variability in phytoplankton removal by a commercial, suspended eastern oyster nursery and effects on local plankton dynamics	JOURNAL OF SHELLFISH RESEARCH	31	4	1077	1089	10.2983/035.031.0419	0730-8000
P110	Van Colen, C; Thrush, SF; Parkes, S; Harris, R; Woodin, SA; Wethey, DS; Pilditch, CA; Hewitt, JE; Lohrer, AM; Vincx, M	2015	Bottom-up and top-down mechanisms indirectly mediate interactions between benthic biotic ecosystem components	JOURNAL OF SEA RESEARCH	98		42	48	10.1016/j.seares.2014.10.016	1385-1101
P112	Vaudrey, JMP; Getchis, T; Shaw, K; Markow, J; Britton, R; Kremer, JN	2009	Effects of oyster depuration gear on eelgras (Zostera marina L.) in a low density aquaculture site in Long Island Sound	JOURNAL OF SHELLFISH RESEARCH	28	2	243	250	10.2983/035.028.0206	0730-8000
P114	Botelho, MJ; Soares, F; Matias, D; Vale, C	2015	Nutrients and clam contamination by Escherichia coli in a meso-tidal coastal lagoon: Seasonal variation in counter cycle to external sources	MARINE POLLUTION BULLETIN	96	2017-02-01	188	196	10.1016/j.marpolbul.2015.05.030	0025-326X
P117	Van Colen, C; Thrush, SF; Vincx, M; Ysebaert, T	2013	Conditional Responses of Benthic Communities to Interference from an Intertidal Bivalve	PLOS ONE	8	6			10.1371/journal.pone.0065861	1932-6203
P118	de Juan, S; Thrush, SF; Hewitt, JE; Halliday, J; Lohrer, AM	2014	Cumulative degradation in estuaries: contribution of individual species to community recovery	MARINE ECOLOGY PROGRESS SERIES	510		25	38	10.3354/meps10904	0171-8630
P120	Riedel, B; Pados, T; Pretterebner, K; Schiemer, L; Steckbauer, A; Haselmair, A; Zuschin, M; Stachowitsch, M	2014	Effect of hypoxia and anoxia on invertebrate behaviour: ecological perspectives from species to community level	BIOGEOSCIENCES	11	6	1491	1518	10.5194/bg-11-1491-014	1726-4170
P121	Hewitt, JE; Norkko, J	2007	Incorporating temporal variability of stressors into studies: An example using suspension-feeding bivalves and elevated suspended sediment concentrations	JOURNAL OF EXPERIMENTAL MARINE BIOLOGY AND ECOLOGY	341	1	131	141	10.1016/j.jembe.2006.09.021	0022-0981
P124	Rossi, F; Gribsholt, B; Middelburg, JJ; Heip, C	2008	Context-dependent effects of suspension feeding on intertidal ecosystem functioning	MARINE ECOLOGY PROGRESS SERIES	354		47	57	10.3354/meps07213	0171-8630
P125	Marshall, KN; Kaplan, IC; Hodgson, EE; Hermann, A; Busch, DS; Mcelhany, P; Essington, TE; Harvey, CJ; Fulton, EA	2017	Risks of ocean acidification in the California Current food web and fisheries: ecosystem model projections	GLOBAL CHANGE BIOLOGY	23	4	1525	1539	10.1111/gcb.13594	1354-1013
P126	Scyphers, SB; Powers, SP; Heck, KL	2015	Ecological Value of Submerged Breakwaters for Habitat Enhancement on a Residential Scale	ENVIRONMENTAL MANAGEMENT	55	2	383	391	10.1007/s00267-014-0394-8	0364-152X
P127	Frid, CLJ	2011	Temporal variability in the benthos: Does the sea floor function differently over time?	JOURNAL OF EXPERIMENTAL MARINE BIOLOGY AND ECOLOGY	400	2017-02-01	99	107	10.1016/j.jembe.2011.02.024	0022-0981
P128	Karlson, AML; Nascimento, FJA; Naslund, J; Elmgren, R	2010	Higher diversity of deposit-feeding macrofauna enhances phytodetritus processing	ECOLOGY	91	5	1414	1423	10.1890/09-0660.1	0012-9658
P130	Marsden, ID; Adkins, SC	2010	Current status of cockle bed restoration in New Zealand	AQUACULTURE INTERNATIONAL	18	1	83	97	10.1007/s10499-009-9270-6	0967-6120
P132	Long, WC; Seitz, RD; Brylawski, BJ; Lipcius, RN	2014	Individual, population, and ecosystem effects of hypoxia on a dominant benthic bivalve in Chesapeake Bay	ECOLOGICAL MONOGRAPHS	84	2	303	327	10.1890/13-0440.1	0012-9615
P133	Chertoprud, MV; Chertoprud, ES; Saravanakumar, A; Thangaradjou, T; Mazei, YA	2013	Macrobenthic communities of the Vellar Estuary in the Bay of Bengal in Tamil-Nadu in South India	OCEANOLOGY	53	2	200	210	10.1134/S0001437013010049	0001-4370
P134	Thrush, SF; Hewitt, JE; Gibbs, M; Lundquist, C; Norkko, A	2006	Functional role of large organisms in intertidal communities: Community effects and ecosystem function	ECOSYSTEMS	9	6	1029	1040	10.1007/s10021-005-0068-8	1432-9840
P135	Hedge, LH; Leung, B; O'Connor, WA; Johnston, EL	2014	The interacting effects of diversity and propagule pressure on early colonization and population size	JOURNAL OF ANIMAL ECOLOGY	83	1	168	175	10.1111/1365-2656.12125	0021-8790
P136	Ruesink, JL; Feist, BE; Harvey, CJ; Hong, JS; Trimble, AC; Wisehart, LM	2006	Changes in productivity associated with four introduced species: ecosystem transformation of a 'pristine' estuary	MARINE ECOLOGY PROGRESS SERIES	311		203	215	10.3354/meps311203	0171-8630
P137	Ferreira, JG; Bricker, SB	2016	Goods and services of extensive aquaculture: shellfish culture and nutrient trading	AQUACULTURE INTERNATIONAL	24	3	803	825	10.1007/s10499-015-9949-9	0967-6120
P139	Lacoste, E; Gaertner-Mazouni, N	2015	Biofouling impact on production and ecosystem functioning: a review for bivalve aquaculture	REVIEWS IN AQUACULTURE	7	3	187	196	10.1111/raq.12063	1753-5123
P141	Volety, AK; Haynes, L; Goodman, P; Gorman, P	2014	Ecological condition and value of oyster reefs of the Southwest Florida shelf ecosystem	ECOLOGICAL INDICATORS	44		108	119	10.1016/j.ecolind.2014.03.012	1470-160X
P142	Baggett, LP; Powers, SP; Brumbaugh, RD; Coen, LD; DeAngelis, BM; Greene, JK; Hancock, BT; Morlock, SM; Allen, BL; Breitburg, DL; Bushek, D; Grabowski, JH; Grizzle, RE; Grosholz, ED; La Peyre, MK; Luckenbach, MW; McGraw, KA; Piehler, MF; Westby, SR; Ermgassen, PSEZ	2015	Guidelines for evaluating performance of oyster habitat restoration	RESTORATION ECOLOGY	23	6	737	745	10.1111/rec.12262	1061-2971
P143	PETERSON, CH; IRLANDI, EA; BLACK, R	1994	THE CRASH IN SUSPENSION-FEEDING BIVALVE POPULATIONS (KATELYSIA SPP) IN PRINCESS-ROYAL HARBOR - AN UNEXPECTED CONSEQUENCE OF EUTROPHICATION	JOURNAL OF EXPERIMENTAL MARINE BIOLOGY AND ECOLOGY	176	1	39	52	10.1016/0022-0981(94)90196-1	0022-0981
P144	Barrell, J; Grant, J	2015	High-resolution, low-altitude aerial photography in physical geography: A case study characterizing eelgrass (Zostera marina L.) and blue mussel (Mytilus edulis L.) landscape mosaic structure	PROGRESS IN PHYSICAL GEOGRAPHY	39	4	440	459	10.1177/0309133315578943	0309-1333
P146	Quan, WM; Humphries, AT; Shen, XQ; Chen, YQ	2012	OYSTER AND ASSOCIATED BENTHIC MACROFAUNAL DEVELOPMENT ON A CREATED INTERTIDAL OYSTER (CRASSOSTREA ARIAKENSIS) REEF IN THE YANGTZE RIVER ESTUARY, CHINA	JOURNAL OF SHELLFISH RESEARCH	31	3	599	610	10.2983/035.031.0302	0730-8000
P147	Milbrandt, EC; Thompson, M; Coen, LD; Grizzle, RE; Ward, K	2015	A multiple habitat restoration strategy in a semi-enclosed Florida embayment, combining hydrologic restoration, mangrove propagule plantings and oyster substrate additions	ECOLOGICAL ENGINEERING	83		394	404	10.1016/j.ecoleng.2015.06.043	0925-8574
P148	Sandwell, DR; Pilditch, CA; Lohrer, AM	2009	Density dependent effects of an infaunal suspension-feeding bivalve (Austrovenus stutchburyi) on sandflat nutrient fluxes and microphytobenthic productivity	JOURNAL OF EXPERIMENTAL MARINE BIOLOGY AND ECOLOGY	373	1	16	25	10.1016/j.jembe.2009.02.015	0022-0981
P149	Townsend, M; Thrush, SF; Hewitt, JE; Lohrer, AM; McCartain, L	2014	Behavioural changes in the Tellinid bivalve Macomona liliana (Iredale, 1915) following exposure to a thin terrigenous sediment deposition event: evidence from time-lapse photography	CAHIERS DE BIOLOGIE MARINE	55	4	475	483		0007-9723
P150	Aoki, S; Yanagiuchi, T; Mizuno, Y; Okamoto, K; Hino, A	2011	Differences in bivalve assemblages of artificial and natural tidal flats in inner Tokyo Bay	NIPPON SUISAN GAKKAISHI	77	4	606	615		0021-5392
P152	Pranovi, F; Sara, G; Franzoi, P	2013	Valuing the Unmarketable: An Ecological Approach to the Externalities Estimate in Fishing Activities	SUSTAINABILITY	5	2	643	653	10.3390/su5020643	2071-1050
P153	Lohrer, AM; Townsend, M; Hailes, SF; Rodil, IF; Cartner, K; Pratt, DR; Hewitt, JE	2016	Influence of New Zealand cockles (Austrovenus stutchburyi) on primary productivity in sandflat-seagrass (Zostera muelleri) ecotones	ESTUARINE COASTAL AND SHELF SCIENCE	181		238	248	10.1016/j.ecss.2016.08.045	0272-7714
P154	Sousa, R; Gutierrez, JL; Aldridge, DC	2009	Non-indigenous invasive bivalves as ecosystem engineers	BIOLOGICAL INVASIONS	11	10	2367	2385	10.1007/s10530-009-9422-7	1387-3547
P155	Grizzle, RE; Greene, JK; Coen, LD	2008	Seston Removal by Natural and Constructed Intertidal Eastern Oyster (Crassostrea virginica) Reefs: A Comparison with Previous Laboratory Studies, and the Value of in situ Methods	ESTUARIES AND COASTS	31	6	1208	1220	10.1007/s12237-008-9098-8	1559-2723
P157	Norkko, A; Villnas, A; Norkko, J; Valanko, S; Pilditch, C	2013	Size matters: implications of the loss of large individuals for ecosystem function	SCIENTIFIC REPORTS	3				10.1038/srep02646	2045-2322
P159	Green, DS; Boots, B; O'Connor, NE; Thompson, R	2017	Microplastics Affect the Ecological Functioning of an Important Biogenic Habitat	ENVIRONMENTAL SCIENCE & TECHNOLOGY	51	1	68	77	10.1021/acs.est.6b04496	0013-936X
P160	Broszeit, S; Hattam, C; Beaumont, N	2016	Bioremediation of waste under ocean acidification: Reviewing the role of Mytilus edulis	MARINE POLLUTION BULLETIN	103		5	14	10.1016/j.marpolbul.2015.12.040	0025-326X
P161	Kellogg, ML; Cornwell, JC; Owens, MS; Paynter, KT	2013	Denitrification and nutrient assimilation on a restored oyster reef	MARINE ECOLOGY PROGRESS SERIES	480		1	19	10.3354/meps10331	0171-8630
P163	Quan, WM; Fan, RL; Wang, YL; Humphries, AT	2017	LONG-TERM OYSTER RECRUITMENT AND GROWTH ARE NOT INFLUENCED BY SUBSTRATE TYPE IN CHINA: IMPLICATIONS FOR SUSTAINABLE OYSTER REEF RESTORATION	JOURNAL OF SHELLFISH RESEARCH	36	1	79	86	10.2983/036.036.0110	0730-8000
P164	Villnas, A; Norkko, J; Lukkari, K; Hewitt, J; Norkko, A	2012	Consequences of Increasing Hypoxic Disturbance on Benthic Communities and Ecosystem Functioning	PLOS ONE	7	10			10.1371/journal.pone.0044920	1932-6203
P167	Gottlieb, SJ; Schweighofer, ME	1996	Oysters and the Chesapeake Bay ecosystem: A case for exotic species introduction to improve environmental quality?	ESTUARIES	19	3	639	650	10.2307/1352524	0160-8347
P169	Pratt, DR; Pilditch, CA; Lohrer, AM; Thrush, SF; Kraan, C	2015	Spatial Distributions of Grazing Activity and Microphytobenthos Reveal Scale-Dependent Relationships Across a Sedimentary Gradient	ESTUARIES AND COASTS	38	3	722	734	10.1007/s12237-014-9857-7	1559-2723
P170	Grangere, K; Lefebvre, S; Bacher, C; Cugier, P; Menesguen, A	2010	Modelling the spatial heterogeneity of ecological processes in an intertidal estuarine bay: dynamic interactions between bivalves and phytoplankton	MARINE ECOLOGY PROGRESS SERIES	415		141	158	10.3354/meps08659	0171-8630
P171	Pratt, DR; Lohrer, AM; Pilditch, CA; Thrush, SF	2014	Changes in Ecosystem Function Across Sedimentary Gradients in Estuaries	ECOSYSTEMS	17	1	182	194	10.1007/s10021-013-9716-6	1432-9840
P175	Cerco, CF	2015	A Multi-module Approach to Calculation of Oyster (Crassostrea virginica) Environmental Benefits	ENVIRONMENTAL MANAGEMENT	56	2	467	479	10.1007/s00267-015-0511-3	0364-152X
P176	Nuttall, MA; Jordaan, A; Cerrato, RM; Frisk, MG	2011	Identifying 120 years of decline in ecosystem structure and maturity of Great South Bay, New York using the Ecopath modelling approach	ECOLOGICAL MODELLING	222	18	3335	3345	10.1016/j.ecolmodel.2011.07.004	0304-3800
P177	Francois, F; Dalegre, K; Gilbert, F; Stora, G	1999	Specific variability within functional groups. Study of the sediment reworking of two Veneridae bivalves, Ruditapes decussatus and Venerupis aurea	COMPTES RENDUS DE L ACADEMIE DES SCIENCES SERIE III-SCIENCES DE LA VIE-LIFE SCIENCES	322	4	339	345	10.1016/S0764-4469(99)80070-5	0764-4469
P178	Wrede, A; Dannheim, J; Gutow, L; Brey, T	2017	Who really matters: Influence of German Bight key bioturbators on biogeochemical cycling and sediment turnover	JOURNAL OF EXPERIMENTAL MARINE BIOLOGY AND ECOLOGY	488		92	101	10.1016/j.jembe.2017.01.001	0022-0981
P179	Saurel, C; Ferreira, JG; Cheney, D; Suhrbier, A; Dewey, B; Davis, J; Cordell, J	2014	Ecosystem goods and services from Manila clam culture in Puget Sound: a modelling analysis	AQUACULTURE ENVIRONMENT INTERACTIONS	5	3	255	270	10.3354/aei00109	1869-215X
P180	Boldina, I; Beninger, PG; Le Coz, M	2014	Effect of long-term mechanical perturbation on intertidal soft-bottom meiofaunal community spatial structure	JOURNAL OF SEA RESEARCH	85		85	91	10.1016/j.seares.2013.10.006	1385-1101
P182	Coen, LD; Luckenbach, MW	2000	Developing success criteria and goals for evaluating oyster reef restoration: Ecological function or resource exploitation?	ECOLOGICAL ENGINEERING	15		323	343	10.1016/S0925-8574(00)00084-7	0925-8574
P183	Filgueira, R; Guyondet, T; Comeau, LA; Tremblay, R	2016	Bivalve aquaculture-environment interactions in the context of climate change	GLOBAL CHANGE BIOLOGY	22	12	3901	3913	10.1111/gcb.13346	1354-1013
P184	Liu, J; Zhou, HP; Qin, P; Zhou, J; Wang, GX	2009	Comparisons of ecosystem services among three conversion systems in Yancheng National Nature Reserve	ECOLOGICAL ENGINEERING	35	5	609	629	10.1016/j.ecoleng.2008.09.007	0925-8574
P185	Harris, RJ; Pilditch, CA; Hewitt, JE; Lohrer, AM; Van Colen, C; Townsend, M; Thrush, SF	2015	Biotic interactions influence sediment erodibility on wave-exposed sandflats	MARINE ECOLOGY PROGRESS SERIES	523		15	30	10.3354/meps11164	0171-8630
P186	Donadi, S; Westra, J; Weerman, EJ; van der Heide, T; van der Zee, EM; van de Koppel, J; Olff, H; Piersma, T; van der Veer, HW; Eriksson, BK	2013	Non-trophic Interactions Control Benthic Producers on Intertidal Flats	ECOSYSTEMS	16	7	1325	1335	10.1007/s10021-013-9686-8	1432-9840
P187	McLenaghan, NA; Tyler, AC; Mahl, UH; Howarth, RW; Marino, RM	2011	Benthic macroinvertebrate functional diversity regulates nutrient and algal dynamics in a shallow estuary	MARINE ECOLOGY PROGRESS SERIES	426		171	184	10.3354/meps09029	0171-8630
P188	Sunda, WG; Graneli, E; Gobler, CJ	2006	Positive feedback and the development and persistence of ecosystem disruptive algal blooms	JOURNAL OF PHYCOLOGY	42	5	963	974	10.1111/j.1529-8817.2006.00261.x	0022-3646
P189	Poirier, LA; Symington, LA; Davidson, J; St-Hilaire, S; Quijon, PA	2017	Exploring the decline of oyster beds in Atlantic Canada shorelines: potential effects of crab predation on American oysters (Crassostrea virginica)	HELGOLAND MARINE RESEARCH	71				10.1186/s10152-017-0493-z	1438-387X
P190	Kluger, LC; Filgueira, R; Wolff, M	2017	Integrating the Concept of Resilience into an Ecosystem Approach to Bivalve Aquaculture Management	ECOSYSTEMS	20	7	1364	1382	10.1007/s10021-017-0118-z	1432-9840
P191	Saraiva, S; Fernandes, L; van der Meer, J; Neves, R; Kooijman, SALM	2017	The role of bivalves in the Balgzand: First steps on an integrated modelling approach	ECOLOGICAL MODELLING	359		34	48	10.1016/j.ecolmodel.2017.04.018	0304-3800
P192	Compton, TJ; Holthuijsen, S; Mulder, M; van Arkel, M; Schaars, LK; Koolhaas, A; Dekinga, A; ten Horn, J; Luttikhuizen, PC; van der Meer, J; Piersma, T; van der Veer, HW	2017	Shifting baselines in the Ems Dollard estuary: A comparison across three decades reveals changing benthic communities	JOURNAL OF SEA RESEARCH	127		119	132	10.1016/j.seares.2017.06.014	1385-1101
P195	Barrios-O'Neill, D; Bertolini, C; Collins, PC	2017	Trophic cascades and the transient keystone concept	BIOLOGICAL CONSERVATION	212		191	195	10.1016/j.biocon.2017.06.011	0006-3207
P198	Gray, CA	2016	Assessment of spatial fishing closures on beach clams	GLOBAL ECOLOGY AND CONSERVATION	5		108	117	10.1016/j.gecco.2015.12.002	2351-9894
P199	Lacoue-Labarthe, T; Nunes, PALD; Ziveri, P; Cinar, M; Gazeau, F; Hall-Spencer, JM; Hilmi, N; Moschella, P; Safa, A; Sauzade, D; Turley, C	2016	Impacts of ocean acidification in a warming Mediterranean Sea: An overview	REGIONAL STUDIES IN MARINE SCIENCE	5		1	11	10.1016/j.rsma.2015.12.005	2352-4855
P200	Lewis, NS; DeWitt, TH	2017	Effect of green macroalgal blooms on the behavior, growth, and survival of cockles Clinocardium nuttallii in Pacific NW estuaries	MARINE ECOLOGY PROGRESS SERIES	582		105	120	10.3354/meps12328	0171-8630
P201	McCartain, LD; Townsend, M; Thrush, SF; Wethey, DS; Woodin, SA; Volkenborn, N; Pilditch, CA	2017	The effects of thin mud deposits on the behaviour of a deposit-feeding tellinid bivalve: implications for ecosystem functioning	MARINE AND FRESHWATER BEHAVIOUR AND PHYSIOLOGY	50	4	239	255	10.1080/10236244.2017.1364123	1023-6244
P202	Galimany, E; Wikfors, GH; Dixon, MS; Newell, CR; Meseck, SL; Henning, D; Li, YQ; Rose, JM	2017	Cultivation of the Ribbed Mussel (Geukensia demissa) for Nutrient Bioextraction in an Urban Estuary	ENVIRONMENTAL SCIENCE & TECHNOLOGY	51	22	13311	13318	10.1021/acs.est.7602838	0013-936X
